# Supplementary material for: Computational design of an amidase by combining the best electrostatic features of two promiscuous hydrolases
Source: Royal Society of Chemistry journal article supplement (doi:10.1039/d2sc00778a), 2022-01-01
Supplement: d2sc00778a1.pdf [file d2sc00778a1.pdf]

## SUPPLEMENTARY INFORMATION

### **Computational design of an amidase by combining the best electrostatic features of two promiscuous hydrolases.**

**Miquel À. Galmés,<sup>1</sup> Alexander R Nödling,<sup>2</sup> Kaining He,<sup>2</sup> Louis Luk,<sup>2,\*</sup> Katarzyna Świderek,<sup>3,\*</sup>  
Vicent Moliner<sup>1,\*</sup>**

1. BioComp Group, Institute of Advanced Materials (INAM), Universitat Jaume I, 12071 Castellón, Spain.
2. School of Chemistry, Cardiff University, Main Building, Park Pl, Cardiff CF10 3AT (United Kingdom)
3. Department of Physical and Analytical Chemistry, Universitat Jaume I, 12071 Castellón, Spain.

corresponding authors:

L. Luk: lukly@cardiff.ac.uk;

K. Świderek: swiderek@uji.es;

V. Moliner: moliner@uji.es

## RESULTS AND ANALYSIS

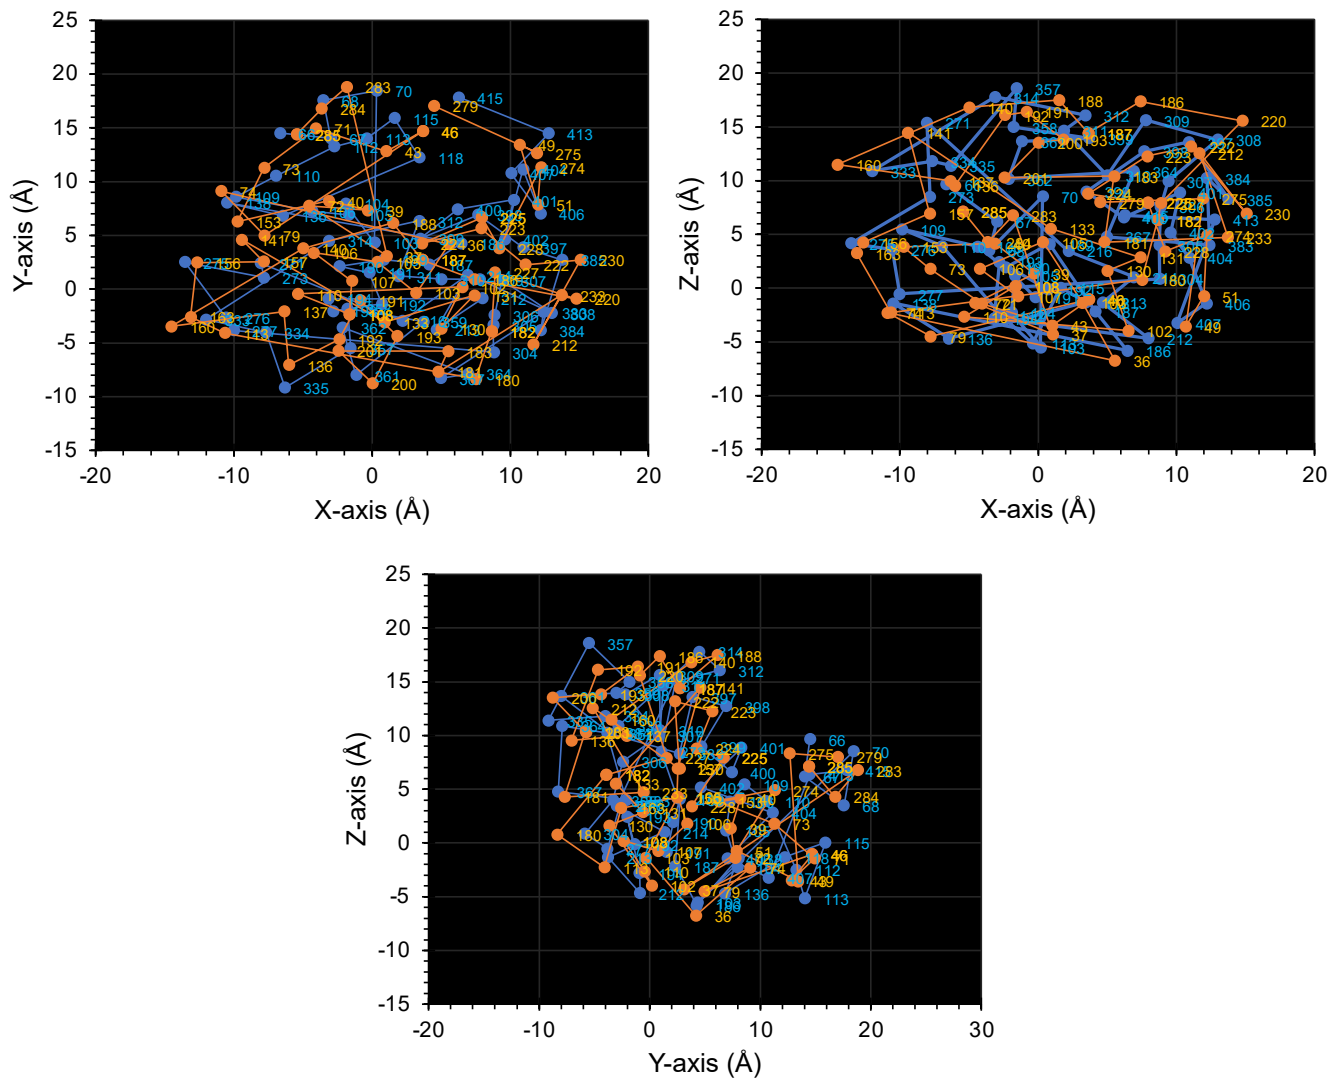

**Figure S1.** Overlapped centers of masses of paired residues from Bs2 (in blue) and CALB (in orange) in 3-dimensional space.

|             |     |     |     |            |     |     |     |     |     |            |     |     |     |            |     |
|-------------|-----|-----|-----|------------|-----|-----|-----|-----|-----|------------|-----|-----|-----|------------|-----|
| <b>Bs2</b>  | 66  | 67  | 68  | 70         | 103 | 104 | 105 | 106 | 109 | 110        | 112 | 113 | 115 | 118        | 136 |
|             | ASP | LEU | LEU | LEU        | ILE | HIS | GLY | GLY | TYR | LEU        | ALA | GLY | GLU | TYR        | TYR |
|             | -   |     |     |            |     | +   |     | .   | .   |            | :   | .   | -   | .          | .   |
|             | ILE | ILE | ALA | ALA        | VAL | MET | GLY | THR | SER | LEU        | PHE | THR | GLN | GLN        | ASN |
| <b>CALB</b> | 285 | 285 | 284 | 283        | 37  | 72  | 39  | 40  | 153 | 73         | 71  | 43  | 46  | 46         | 79  |
| <b>Bs2</b>  | 138 | 186 | 187 | <b>189</b> | 190 | 191 | 192 | 193 | 194 | 212        | 213 | 214 | 216 | 271        | 273 |
|             | LEU | PHE | GLY | <b>SER</b> | ALA | GLY | GLY | MET | SER | ILE        | MET | GLU | GLY | PHE        | LEU |
|             | .   | :   | .   |            | .   |     |     |     | .   |            |     | -   | .   | :          | .   |
|             | ASN | LEU | THR | <b>SER</b> | GLN | GLY | GLY | GLY | VAL | LEU        | ALA | PHE | PRO | ALA        | GLN |
| <b>CALB</b> | 74  | 36  | 103 | <b>105</b> | 106 | 107 | 108 | 108 | 110 | 102        | 130 | 131 | 133 | 141        | 157 |
| <b>Bs2</b>  | 275 | 276 | 277 | 304        | 305 | 306 | 307 | 308 | 309 | <b>310</b> | 311 | 312 | 314 | 333        | 334 |
|             | PHE | GLN | PRO | ILE        | GLY | THR | THR | ARG | ASP | <b>GLU</b> | GLY | TYR | PHE | TYR        | LEU |
|             | .   | .   | o   | .          |     | .   |     | +   | -   |            | -   | -   | :   | :          |     |
|             | GLN | LEU | TRP | THR        | LEU | LEU | SER | PHE | THR | <b>ASP</b> | ASP | GLU | LEU | GLY        | GLY |
| <b>CALB</b> | 156 | 163 | 113 | 180        | 182 | 182 | 227 | 220 | 186 | <b>187</b> | 187 | 188 | 140 | 160        | 137 |
| <b>Bs2</b>  | 335 | 357 | 358 | 359        | 361 | 362 | 364 | 367 | 383 | 384        | 385 | 397 | 398 | <b>399</b> | 400 |
|             | LEU | MET | MET | THR        | LEU | LEU | TRP | ALA | TYR | ARG        | PHE | ALA | PHE | <b>HIS</b> | ALA |
|             | +   | .   | .   |            | -   | .   |     | .   | .   | +          | .   |     | -   |            |     |
|             | LYS | PRO | GLN | GLN        | ASP | SER | TYR | ASN | SER | ALA        | SER | ILE | ASP | <b>HIS</b> | ALA |
| <b>CALB</b> | 136 | 192 | 191 | 193        | 200 | 201 | 183 | 181 | 233 | 212        | 230 | 222 | 223 | <b>224</b> | 225 |
| <b>Bs2</b>  | 401 | 402 | 404 | 406        | 407 | 413 | 415 |     |     |            |     |     |     |            |     |
|             | LEU | GLU | PRO | VAL        | PHE | LEU | ARG |     |     |            |     |     |     |            |     |
|             |     | -   | .   | .          | -   |     | +   |     |     |            |     |     |     |            |     |
|             | ALA | LEU | ALA | ASN        | ASP | ALA | ALA |     |     |            |     |     |     |            |     |
| <b>CALB</b> | 225 | 228 | 274 | 51         | 49  | 275 | 279 |     |     |            |     |     |     |            |     |

**Figure S2. Structural alignment of Bs2 and CALB.** In red the paired residues of the catalytic triad are highlighted. Double “|” is used to mark equal residues; single “|” refers to a change to a residue of the same family (polar, non-polar, positively charged, negatively charged, and aromatic); colon “:” is marking the change between non-polar to aromatic; simple dot “.” refers to the change between polar and non-polar residues; “o” is used for the changes among polar and aromatic residues; “+” refers to the change in a positively charged residue; and “-” refers to a change in a negatively charged residue.

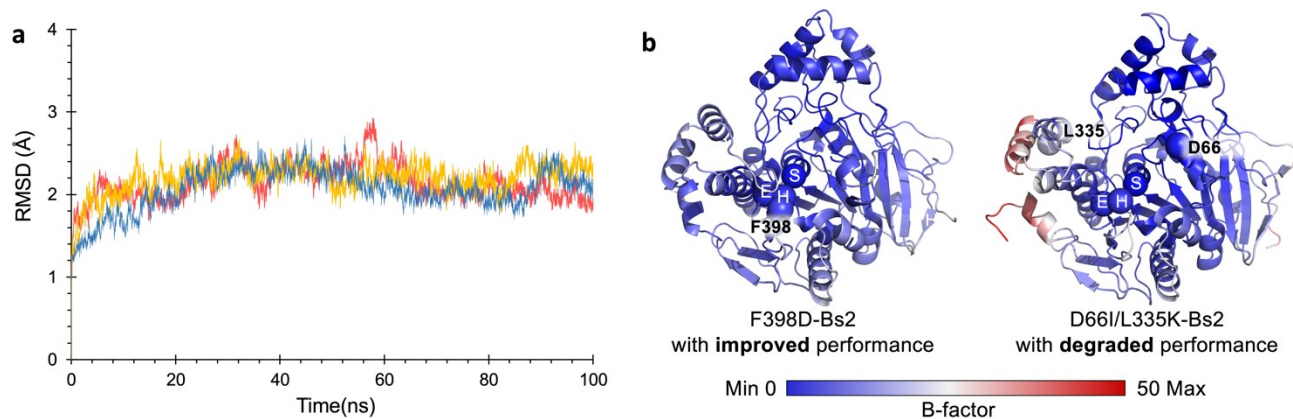

**Figure S3. Analysis of 100 ns molecular dynamic simulations.** **a**, Root mean square deviation (RMSD) of the position of C $\alpha$ , C, and N atoms of the backbone along 100 ns of MD simulations computed for the F398D Bs2 variant (blue), F398D-H<sup>+</sup> Bs2 variant (yellow) and D66I/L335K Bs2 variant (red) along MD simulations. **b**, B-factor per atom computed as atomic oscillations around the equilibrium positions recorded during MD simulations. The red regions correspond to the flexible parts of the protein, the blue areas are static.

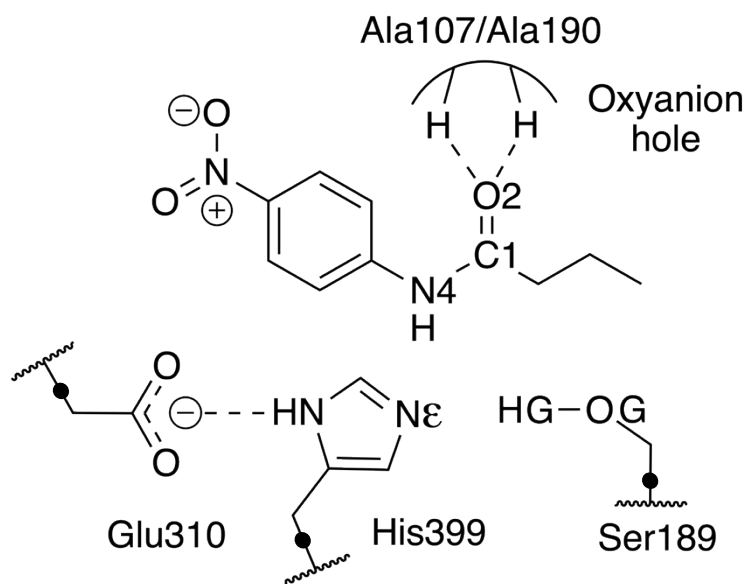

**Figure S4.** Schematic representation of the QM sub-set region (shadowed region). Black dots represent link atoms between QM and MM regions. The H-bond interactions between *N*-(4-nitrophenyl)-butyramide substrate and the oxyanion hole, are shown as dashed lines.

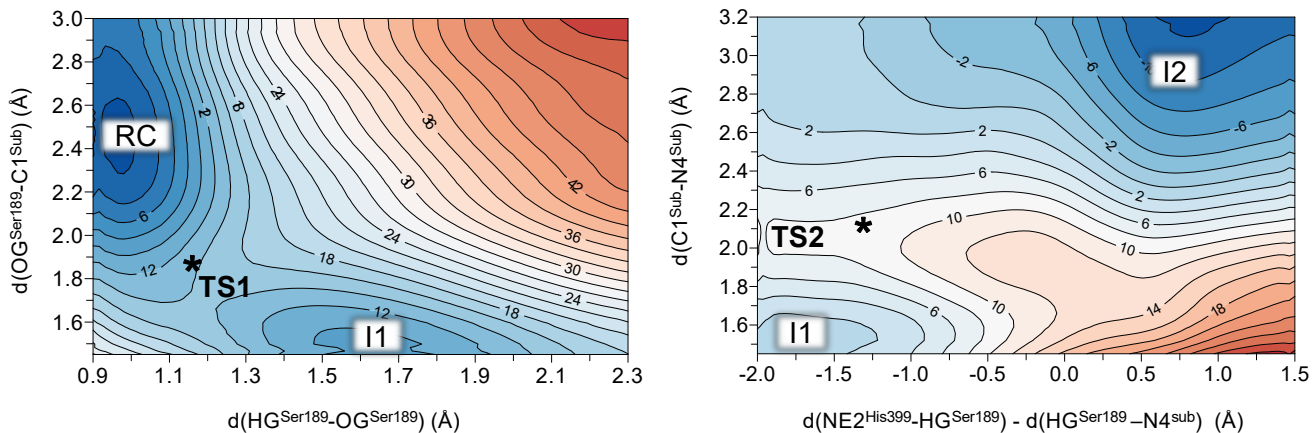

**Figure S5. M06-2X:AM1/OPLS-AA Free Energy Surfaces of F398D Bs2 variant.** Distances are given in Å and isoenergetic lines are in kcal·mol<sup>-1</sup>. The black stars indicate the position of single TS structures localized at potential energy surface computed at M06-2X/OPLS-AA level of theory.

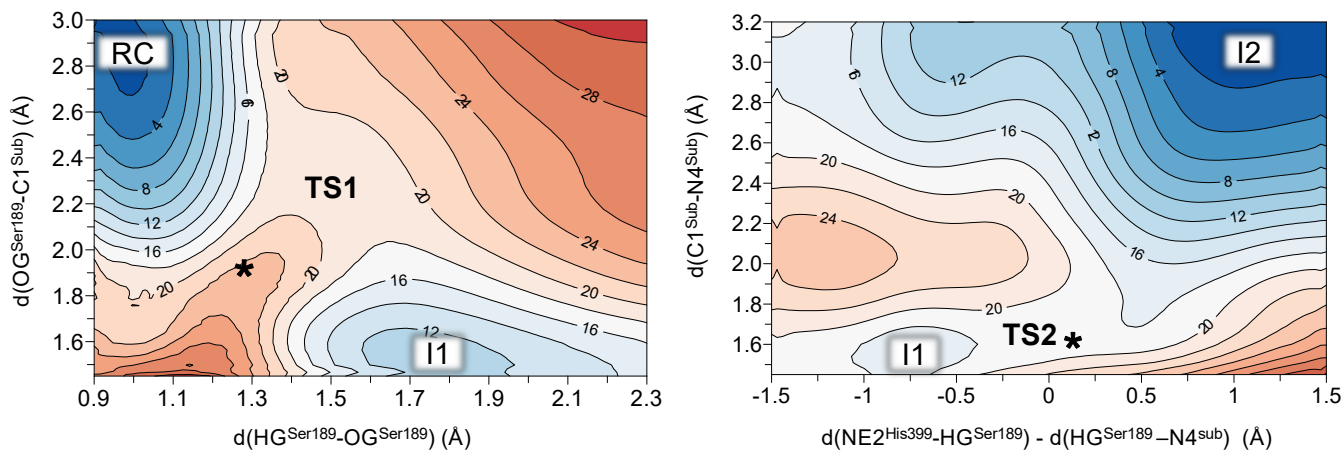

**Figure S6. M06-2X:AM1/OPLS-AA Free Energy Surfaces of F398D-H<sup>+</sup> Bs2 variant.** Distances are given in Å and isoenergetic lines are in kcal·mol<sup>-1</sup>. The black stars indicate the position of single TS structures localized at potential energy surface computed at M06-2X/OPLS-AA level of theory.

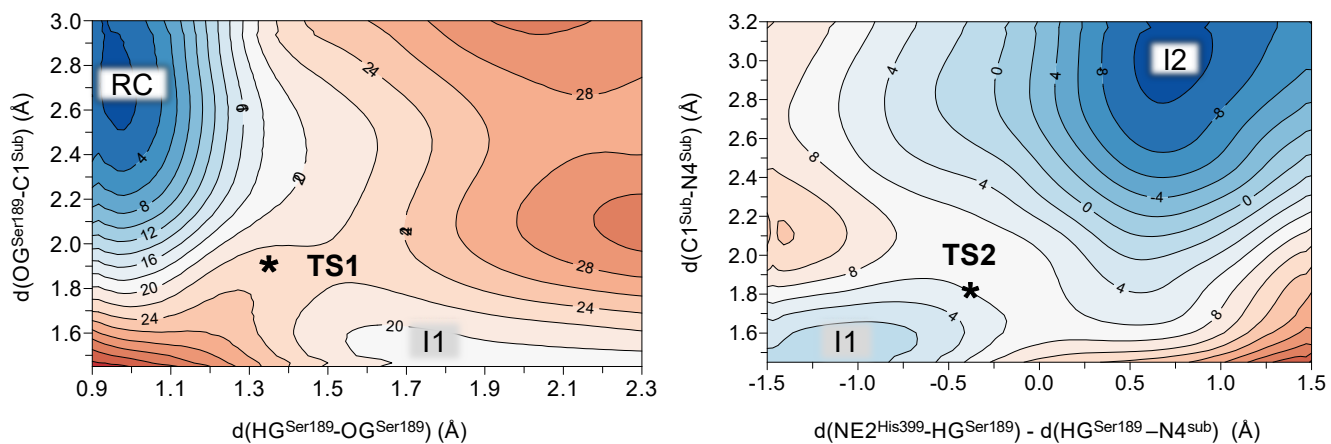

**Figure S7. M06-2X:AM1/OPLS-AA Free Energy Surfaces of D66I/L335K Bs2 variant.** Distances are given in Å and isoenergetic lines are in  $\text{kcal}\cdot\text{mol}^{-1}$ . The black stars indicate the position of single TS structures localized at potential energy surface computed at M06-2X/OPLS-AA level of theory.

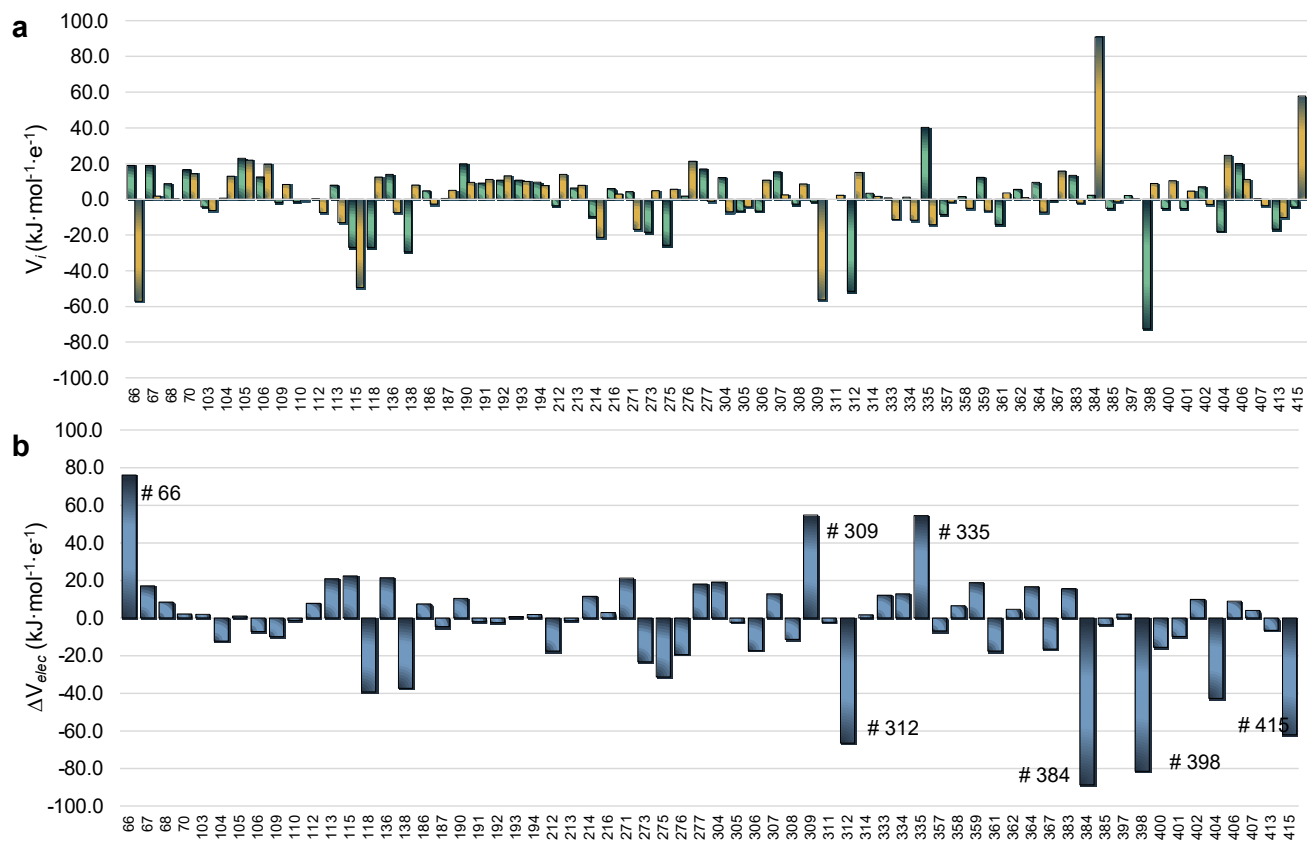

**Figure S8. The electrostatic potential generated by Bs2 and CALB per residue. a,** Electrostatic potential generated per residue on the N $\epsilon$  atom of the active site histidine (His399/His224) in the TS1 structure optimized in Bs2 (yellow bars) and in CALB (green bars). **b,** the difference in the electrostatic potential per residue between Bs2 and CALB.  $\Delta V_{elec}$  values were calculated as  $V_i^{Bs2} - V_i^{CALB}$  where  $i$  is the corresponding residue in the aligned pairs. Only the residues within 15 Å from the center of mass of the substrate were taken into consideration.



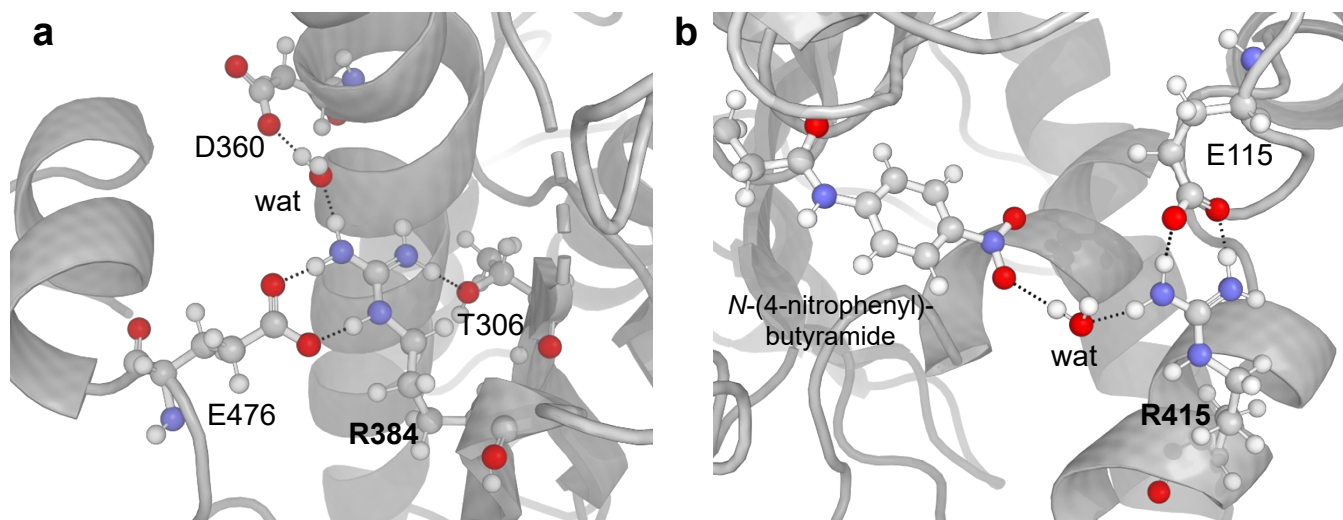

**Figure S9. Detailed view of the surrounding of R384 and R415 in Bs2.** **a**, Hydrogen bonding network of R384 with the lateral chains of E476, D360 and T306. **b**, Hydrogen bond interactions of R415 with E115 and the substrate *N*-(4-nitrophenyl)-butyramide.

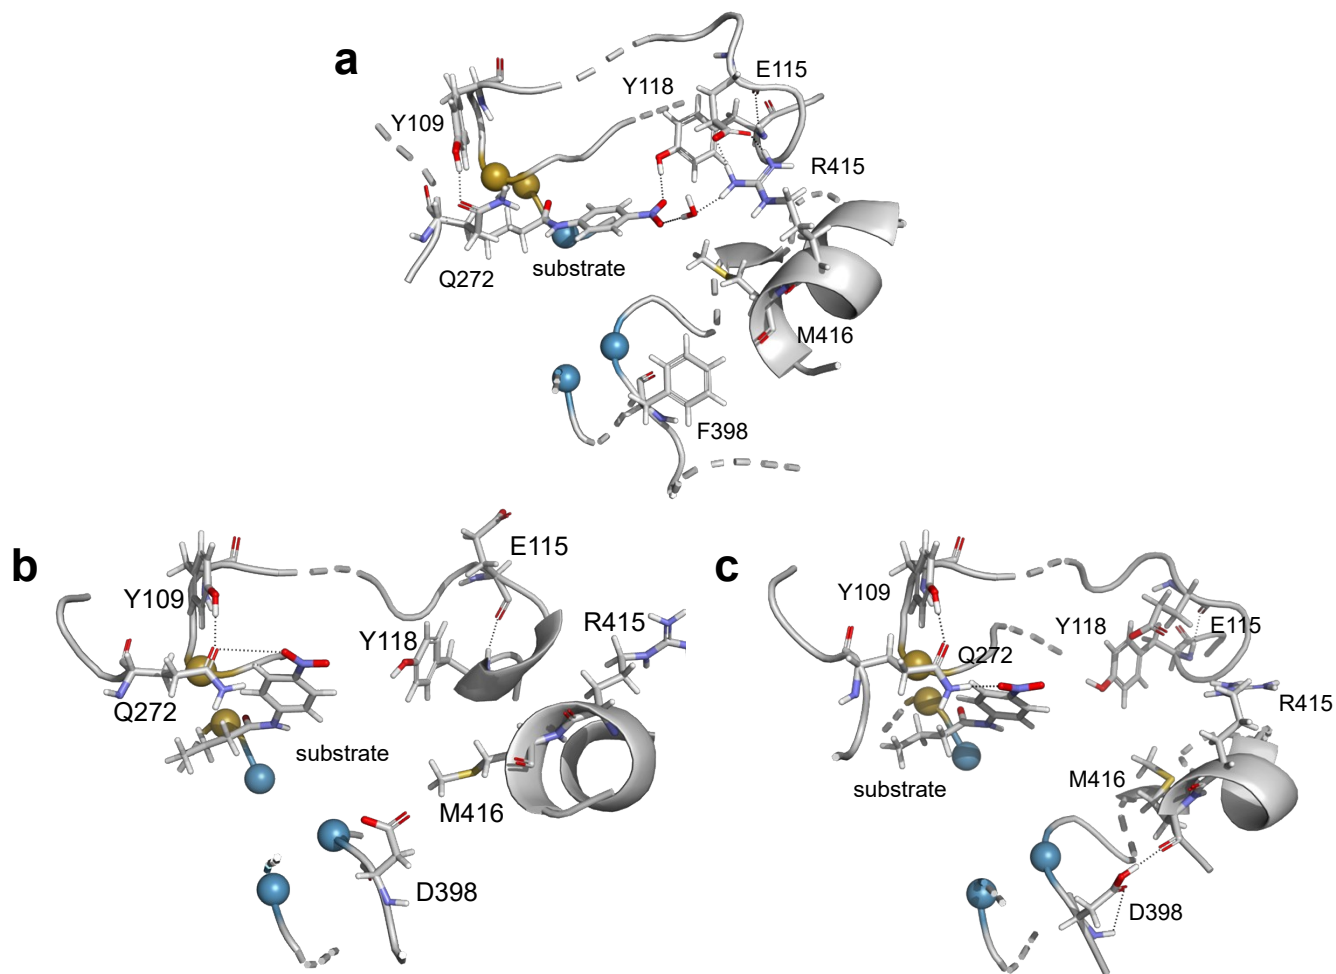

**Figure S10. Detailed image of the arrangement of the substrate contacts in wild-type Bs2 and F398D-H<sup>+</sup> Bs2.** **a**, interactions of Y118 and R415 with the nitro group of *N*-(4-nitrophenyl)-butyramide in wild-type Bs2. **b**, interactions of Y109 and Q272 with the nitro group of *N*-(4-nitrophenyl)-butyramide in F398D Bs2. **c**, interactions of Y109 and Q272 with the nitro group of *N*-(4-nitrophenyl)-butyramide in F398D-H<sup>+</sup> Bs2. The mutation F398D-H<sup>+</sup> leads to the formation of a hydrogen bond with the backbone of M416, promoting the rearrangement of the interactions with the substrate. Blue spheres represent the catalytic triad while yellow spheres are the residues involved in the oxyanion hole.

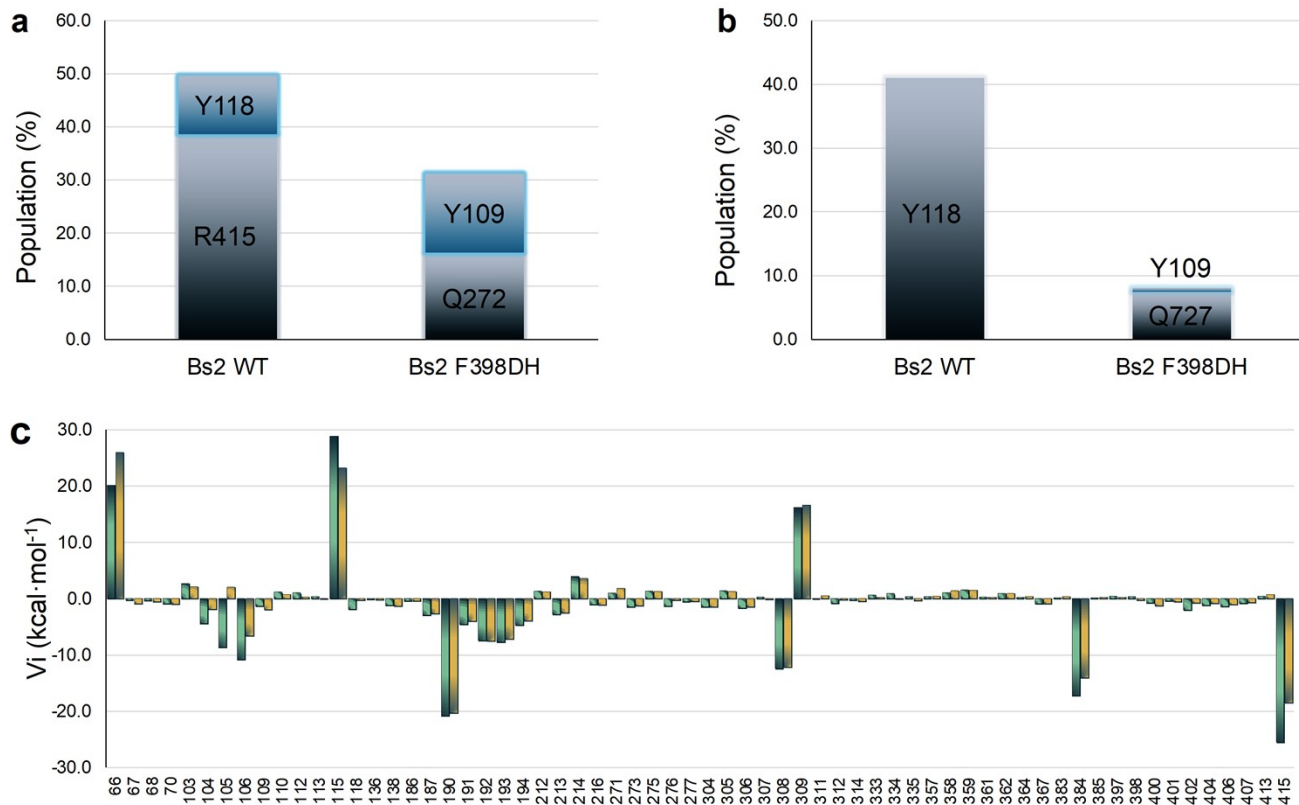

**Figure S11. Analysis of contacts and interactions of wild-type Bs2 and F398D-H<sup>+</sup> Bs2 along the molecular dynamics simulation.** **a**, water bridge contacts of key residues with the nitro group of the substrate. **b**, hydrogen bond contacts of key residues with the nitro group of the substrate. **c**, electrostatic interactions of the residues within 15 Å with the substrate along the molecular dynamics simulation. Green bars represent the interactions in the wild-type Bs2 while yellow ones correspond to the F398D-H<sup>+</sup> Bs2 variant.

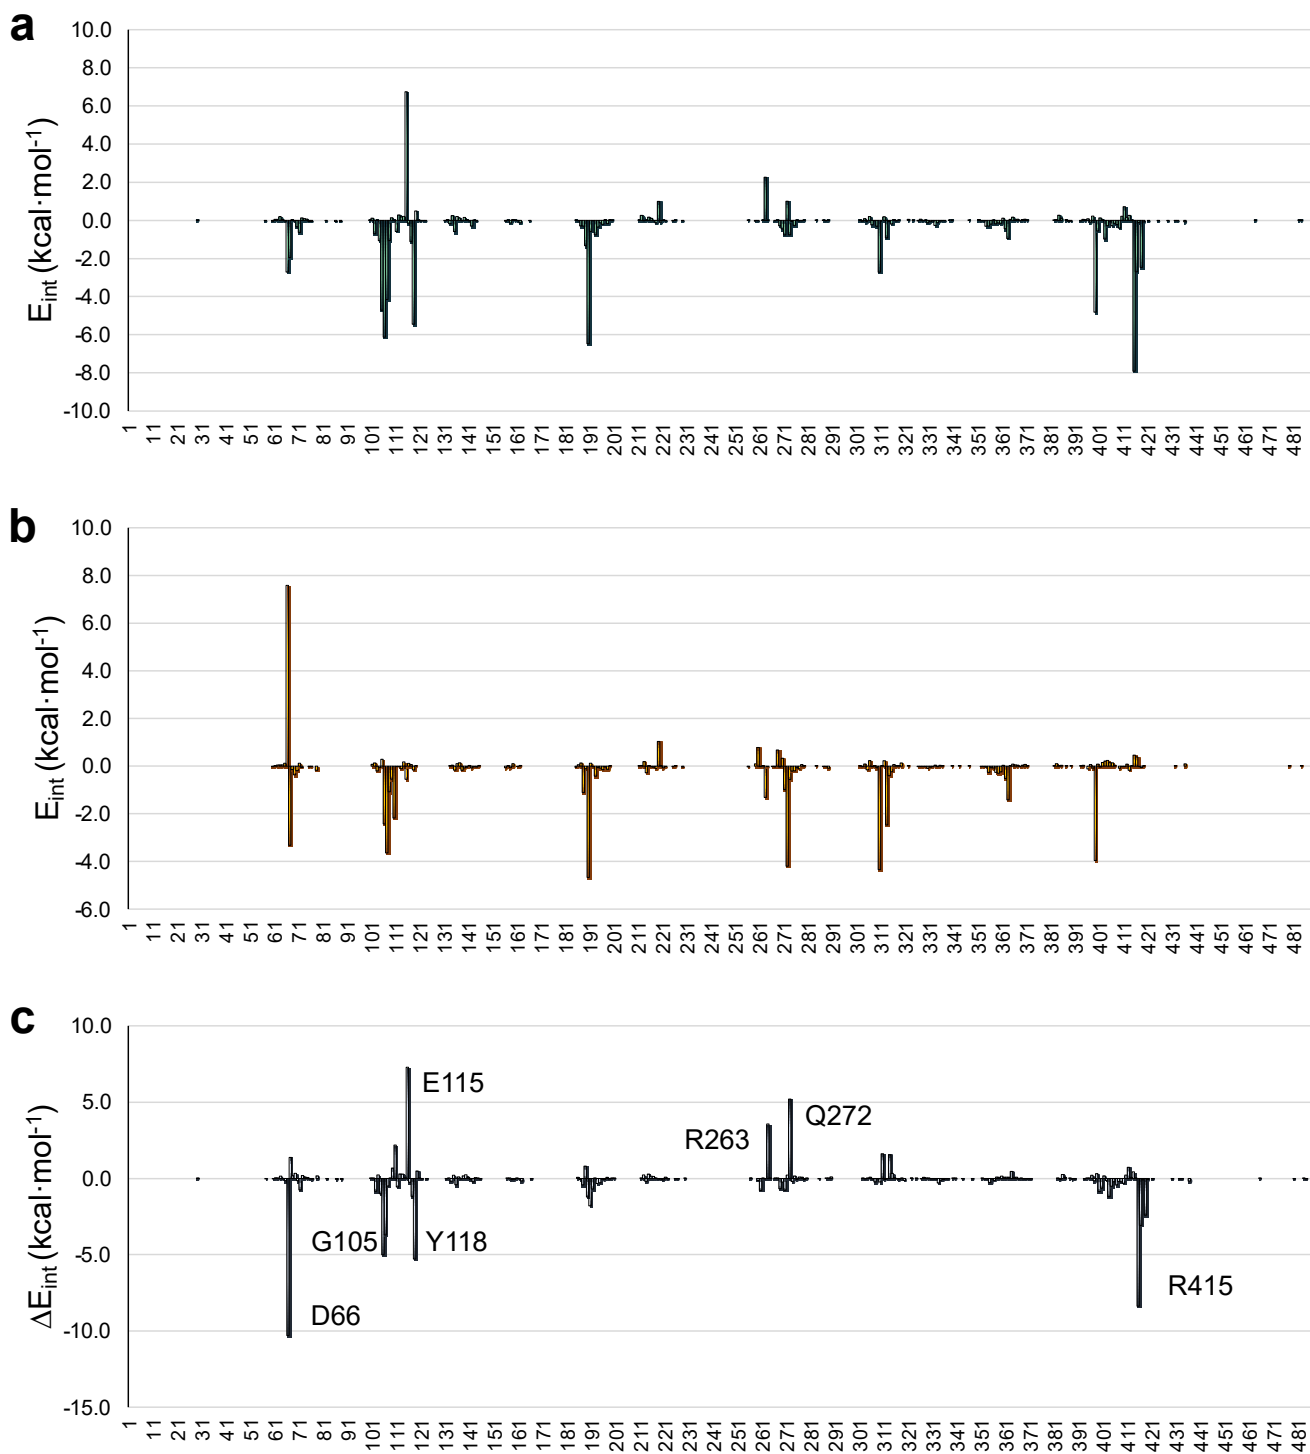

**Figure S12. Interaction energies of the protein by residue with the substrate. a**, interactions in wild type Bs2; **b**, interactions in the F398D-H<sup>+</sup> Bs2 variant; **c**, difference of interactions energies computed as  $E_{int}^{wild-type} - E_{int}^{F398D-H^+}$ .

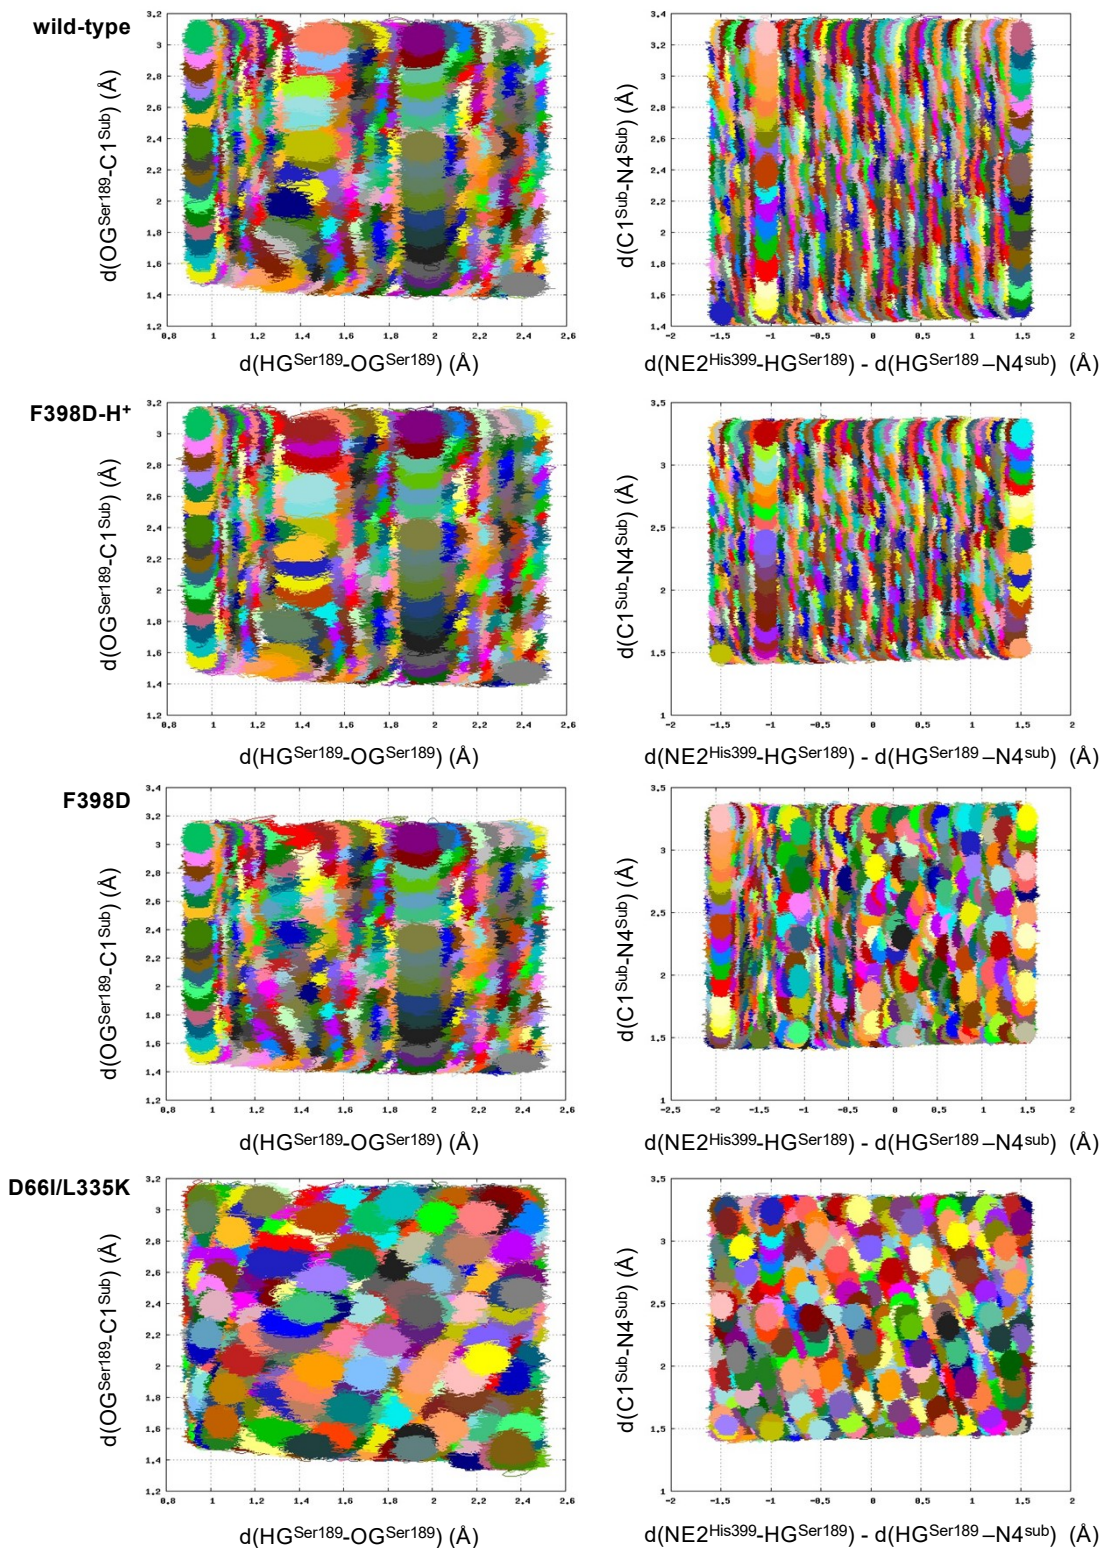

**Figure S13.** Representation of the overlapping between windows during the MD simulation of the Umbrella Sampling for all four Bs2 variants.

**Table S1.** Key inter-atomic distances of the different states appearing along the acylation step of *N*-(4-nitrophenyl)-butyramide catalyzed by F398D Bs2 variant. Structures optimized at M06-2X/MM level. All distances are given in Å.

|                                               | RC   | TS1  | INT1 | INT1 | TS2  | INT2 |
|-----------------------------------------------|------|------|------|------|------|------|
| OG <sub>Ser189</sub> – C1 <sub>subs</sub>     | 2.26 | 1.87 | 1.50 | 1.48 | 1.38 | 1.32 |
| OG <sub>Ser189</sub> – HG <sub>Ser189</sub>   | 1.03 | 1.16 | 1.75 | 1.74 | 1.89 | 2.48 |
| N <sub>His399</sub> – HG <sub>Ser189</sub>    | 1.52 | 1.34 | 1.04 | 1.04 | 1.02 | 1.81 |
| C1 <sub>subs</sub> – N4 <sub>subs</sub>       | 1.43 | 1.48 | 1.56 | 1.56 | 2.12 | 3.07 |
| HG <sub>Ser189</sub> – N4 <sub>subs</sub>     | 2.72 | 2.54 | 2.45 | 2.48 | 2.33 | 1.05 |
| HD1 <sub>His399</sub> – OE1 <sub>Glu310</sub> | 1.68 | 1.61 | 1.44 | 1.43 | 1.42 | 1.74 |
| HD1 <sub>His399</sub> – ND1 <sub>His399</sub> | 1.05 | 1.05 | 1.10 | 1.11 | 1.11 | 1.04 |
| C1 <sub>subs</sub> – O2 <sub>subs</sub>       | 1.22 | 1.24 | 1.29 | 1.29 | 1.23 | 1.23 |
| O2 <sub>subs</sub> – H <sub>Ala190</sub>      | 1.80 | 1.83 | 1.71 | 1.71 | 1.66 | 1.75 |
| O2 <sub>subs</sub> – H <sub>Ala107</sub>      | 1.69 | 1.72 | 1.72 | 1.69 | 1.75 | 1.77 |

**Table S2.** ESP charges (in a.u.) of the key atoms of the amide substrate computed at M06-2X/MM level on the states involved in the acylation step catalyzed by the F398D Bs2 variant from reactants state (RS) to Intermediate 2 (INT2).

|                      | RC     | TS1    | INT1   | INT1   | TS2    | INT2   |
|----------------------|--------|--------|--------|--------|--------|--------|
| C1 <sub>subs</sub>   | 0.568  | 0.813  | 0.816  | 0.817  | 0.731  | 0.721  |
| N4 <sub>subs</sub>   | -0.592 | -0.690 | -0.628 | -0.739 | -0.648 | -0.779 |
| O2 <sub>subs</sub>   | -0.694 | -0.828 | -0.983 | -0.744 | -0.795 | -0.748 |
| N <sub>His399</sub>  | -0.070 | -0.057 | -0.076 | -0.075 | -0.028 | -0.352 |
| OG <sub>Ser189</sub> | -0.485 | -0.479 | -0.480 | -0.444 | -0.401 | -0.399 |

**Table S3.** Key inter-atomic distances of the different states appearing along the acylation step of *N*-(4-nitrophenyl)-butyramide catalyzed by F398D-H<sup>+</sup> Bs2 variant. Structures optimized at M06-2X/MM level. All distances are given in Å.

|                                                       | RC   | TS1  | INT1 | INT1 | TS2  | INT2 |
|-------------------------------------------------------|------|------|------|------|------|------|
| OG <sub>Ser189</sub> – C1 <sub>subs</sub>             | 2.37 | 1.92 | 1.50 | 1.48 | 1.45 |      |
| OG <sub>Ser189</sub> – HG <sub>Ser189</sub>           | 1.01 | 1.29 | 2.52 | 2.95 | 2.67 |      |
| N $\epsilon$ <sub>His399</sub> – HG <sub>Ser189</sub> | 1.73 | 1.28 | 1.03 | 1.03 | 1.39 |      |
| C1 <sub>subs</sub> – N4 <sub>subs</sub>               | 1.42 | 1.47 | 1.54 | 1.54 | 1.62 |      |
| HG <sub>Ser189</sub> – N4 <sub>subs</sub>             | 2.72 | 2.59 | 2.04 | 2.06 | 1.26 |      |
| HD1 <sub>His399</sub> – OE1 <sub>Glu310</sub>         | 1.73 | 1.28 | 1.03 | 1.03 | 1.39 |      |
| HD1 <sub>His399</sub> – ND1 <sub>His399</sub>         | 1.01 | 1.29 | 2.52 | 2.95 | 2.67 |      |
| C1 <sub>subs</sub> – O2 <sub>subs</sub>               | 1.68 | 1.60 | 1.59 | 1.57 | 1.70 |      |
| O2 <sub>subs</sub> – H <sub>Ala190</sub>              | 1.03 | 1.05 | 1.06 | 1.06 | 1.04 |      |
| O2 <sub>subs</sub> – H <sub>Ala107</sub>              | 1.22 | 1.24 | 1.30 | 1.30 | 1.29 |      |

**Table S4.** ESP charges (in a.u.) of the key atoms of the amide substrate computed at M06-2X/MM level on the states involved in the acylation step catalyzed by the F398D-H<sup>+</sup> Bs2 variant from reactants state (RS) to Intermediate 2 (INT2).

|                                | RC     | TS1    | INT1   | INT1   | TS2    | INT2 |
|--------------------------------|--------|--------|--------|--------|--------|------|
| C1 <sub>subs</sub>             | 0.755  | 0.959  | 0.930  | 0.853  | 0.745  |      |
| N4 <sub>subs</sub>             | -0.776 | -0.836 | -0.797 | -0.715 | -0.395 |      |
| O2 <sub>subs</sub>             | -0.692 | -0.840 | -0.988 | -0.978 | -0.950 |      |
| N $\epsilon$ <sub>His399</sub> | -0.229 | -0.135 | -0.092 | -0.092 | -0.198 |      |
| OG <sub>Ser189</sub>           | -0.573 | -0.655 | -0.561 | -0.540 | -0.510 |      |

**Table S5.** Key inter-atomic distances of the different states appearing along the acylation step of *N*-(4-nitrophenyl)-butyramide catalyzed by D66I/L335K Bs2 variant. Structures optimized at M06-2X/MM level. All distances are given in Å.

|                                                       | RC   | TS1  | INT1 | INT1 | TS2  | INT2 |
|-------------------------------------------------------|------|------|------|------|------|------|
| OG <sub>Ser189</sub> – C1 <sub>subs</sub>             | 2.44 | 1.91 | 1.49 | 1.48 | 1.41 | 1.33 |
| OG <sub>Ser189</sub> – HG <sub>Ser189</sub>           | 1.00 | 1.35 | 2.26 | 2.48 | 2.46 | 2.65 |
| N $\epsilon$ <sub>His399</sub> – HG <sub>Ser189</sub> | 1.67 | 1.19 | 1.04 | 1.05 | 1.50 | 1.77 |
| C1 <sub>subs</sub> – N4 <sub>subs</sub>               | 1.35 | 1.41 | 1.53 | 1.55 | 1.82 | 2.70 |
| HG <sub>Ser189</sub> – N4 <sub>subs</sub>             | 2.68 | 2.62 | 1.89 | 1.76 | 1.12 | 1.04 |
| HD1 <sub>His399</sub> – OE1 <sub>Glu310</sub>         | 1.00 | 1.35 | 2.26 | 2.48 | 2.46 | 2.65 |
| HD1 <sub>His399</sub> – ND1 <sub>His399</sub>         | 1.68 | 1.59 | 1.56 | 1.57 | 1.68 | 1.70 |
| C1 <sub>subs</sub> – O2 <sub>subs</sub>               | 1.04 | 1.05 | 1.06 | 1.06 | 1.04 | 1.03 |
| O2 <sub>subs</sub> – H <sub>Ala190</sub>              | 1.25 | 1.27 | 1.31 | 1.31 | 1.27 | 1.23 |
| O2 <sub>subs</sub> – H <sub>Ala107</sub>              | 2.14 | 1.89 | 1.84 | 1.89 | 1.99 | 1.85 |

**Table S6.** ESP charges (in a.u.) of the key atoms of the amide substrate computed at M06-2X/MM level on the states involved in the acylation step reaction catalyzed by the D66I/L335K Bs2 variant from reactants state (RS) to Intermediate 2 (INT2).

|                                | RC     | TS1    | INT1   | INT1   | TS2    | INT2   |
|--------------------------------|--------|--------|--------|--------|--------|--------|
| C1 <sub>subs</sub>             | 0.847  | 0.970  | 0.837  | 0.938  | 0.946  | 0.928  |
| N4 <sub>subs</sub>             | -0.858 | -0.963 | -0.757 | -0.845 | -0.680 | -1.048 |
| O2 <sub>subs</sub>             | -0.905 | -0.985 | -1.084 | -1.112 | -1.059 | -0.903 |
| N $\epsilon$ <sub>His399</sub> | -0.122 | -0.095 | -0.173 | -0.211 | -0.305 | -0.371 |
| OG <sub>Ser189</sub>           | -0.512 | -0.662 | -0.545 | -0.615 | -0.565 | -0.491 |



**Table S7.** Free energies derived from the free energy surfaces computed at M06-2X for the acylation step of the four Bs2 variants. All energies are relative to RC in kcal·mol<sup>-1</sup>.

|                      | RC  | TS1  | I1   | TS2  | I2   |
|----------------------|-----|------|------|------|------|
| WT                   | 0.0 | 19.2 | 9.3  | 17.6 | 2.8  |
| F398D                | 0.0 | 13.0 | 8.2  | 14.3 | -6.8 |
| D66I/L335K           | 0.0 | 20.8 | 17.7 | 23.5 | 6.1  |
| F398D-H <sup>+</sup> | 0.0 | 18.8 | 10.5 | 12.5 | -5.4 |

## COMPUTATIONAL METHODS

**Models set up.** Wild type *p*-nitrobenzyl (PNB) esterase sequence from *Bacillus subtilis* (with ID P37967) that corresponds to the protein used in the experimental measurements<sup>1</sup> was initially taken from UniProt<sup>2</sup> accessible resource of protein sequence and functional information. Due to the lack of crystallized structure for this specific variant, the framework for the required model, a natural variant of the protein (strain 168), was prepared based on PNB esterase from the same organism (Bs2; PDB ID: 1QE3).<sup>3</sup> Both enzymes share 97.6 % of sequence identity. Thus, the X-ray structure was used as a template to build the Bs2 model by adding the missing residues and introducing required mutations. All changes were done using Modeller.<sup>4</sup>

Based on the structure of the wild type which was studied in the previous works<sup>5</sup>, three variants were prepared, F398D, protonated F398D-H<sup>+</sup> and D66I/L335K. The protonation state of titratable residues was determined at pH 7 by estimating pKa shifts generated by the local environment on titratable groups using the empirical program PropKa ver. 3.0.3.<sup>6,7</sup> The values of pKa obtained for Glu188 (8.72), Glu214 (7.52), and Glu402 (10.32) ensured their protonated state. Additionally, all histidines residues present in the enzyme were found to be neutral, with pKa values varying between 4.12 and 6.19. After a detailed inspection of the surrounding of each histidine residue, it was concluded that all should be protonated in N $\delta$  position. *N*-(4-nitrophenyl)-butyramide substrate was placed inside the active site pocket covalently bound to catalytic Ser189 in the form of intermediate 1, in order to avoid possible substrate dissociation to the solvent during MD simulations. Thus, once the hydrogen atoms were added to the structure, the counterions ions were placed in the most electrostatically favorable positions to neutralize the system. Depending on the variant of the enzyme the 21, 20 and 18 sodium ions were added, for F398D, F398D-H<sup>+</sup> and D66I/L335K, variant of Bs2, respectively. Subsequently, the system was solvated by placing it in a 100  $\times$  80  $\times$  80  $\text{\AA}^3$  pre-equilibrated box of TIP3P<sup>8</sup> water molecules. Any water with an oxygen atom lying

in a radius of 2.8 Å from a heavy atom of the protein was deleted. In order to equilibrate the total system, classical MD simulations were done. For *N*-(4-nitrophenyl)-butyramide the same force field parameters were used as determined in our previous work.<sup>9</sup> Such prepared model was optimized, then the system was heated to 303 K with 0.1 K temperature increment and equilibrated during short (100 ps) NPT MD simulations, the proper 50 ns of non-accelerated classical MD simulations were done using the NVT ensemble with AMBER force field,<sup>10</sup> as implemented in NAMD software.<sup>11</sup> The temperature during the MD simulation was controlled using the Langevin thermostat.<sup>12</sup> In order to improve the time of simulations, cut-offs for nonbonding interactions were applied using a smooth switching function between 14.5 and 16 Å. During MD simulations all atoms were free to move. Periodic boundary conditions were used. Time-dependent evolution of the root mean square deviations (RMSD) for all three variants and B-factors for F398D and D66I/L335K Bs2 variants are depicted in Figure S3. All the analysis of the MD, including RMSD, B-factors and contacts was done using AmberTools.<sup>13</sup> Based on the RMSD obtained from MD simulations it was concluded that all three models of Bs2 variants that will be studied by QM/MM methods (F398D, F398D-H<sup>+</sup> and D66I/L335K) do not suffer any dramatic changes during MD simulations, and their values oscillate within the standard deviation, not higher than 0.25 Å. Thus, one structure from each of the MD simulations was chosen for further study applying QM/MM approach. The starting structures were selected by its proximity to the average values of RMSD.

**QM/MM simulations.** In the present work, the standard additive hybrid QM/MM scheme was used to construct the total Hamiltonian,  $\hat{H}_{QM/MM}$ , where the total energy  $E_{QM/MM}$  is obtained as the sum of specific contributions, as presented in equation 1:

$$E_{QM/MM} = \langle \Psi | \hat{H}_o | \Psi \rangle + \left( \sum \left\langle \Psi \left| \frac{q_{MM}}{r_{e,MM}} \right| \Psi \right\rangle + \sum \sum \frac{Z_{QM} q_{MM}}{r_{QM,MM}} \right) + E_{QM/MM}^{vdW} + E_{MM} \quad (1)$$

where  $E_{MM}$  is the energy of the MM subsystem term,  $E_{QM-MM}^{vdW}$  the van der Waals interaction energy between the QM and MM subsystems and  $E_{QM-MM}^{elect}$  includes both the Coulombic interaction of the QM nuclei ( $Z_{QM}$ ) and the electrostatic interaction of the polarized electronic wave function ( $q_{MM}$ ) with the charges of the protein ( $q_{MM}$ ). The region described by quantum mechanics includes the side chains of the catalytic Ser189, His399 and Glu310 residues as well as the full substrate, and one water molecule, as shown in Figure S4. Three-link atoms<sup>14</sup> were inserted where the QM/MM boundary intersected covalent bonds: these were placed between the Ca-Cb for Ser189, His299 and Glu310.

Finally, in the QM part the 55 were defined including link atoms. The rest of the protein, counterions and solvent molecules (in total 73070 atoms in F398D and F398D-H<sup>+</sup>, and 73085 atoms in D66I/L335K variants) were represented by classical OPLS-AA force field<sup>15</sup> and TIP3P force fields, respectively, as implemented in fDynamo library.<sup>16</sup> The Austin Model 1 (AM1)<sup>17</sup> semiempirical Hamiltonian and the Minnesota Functional M06-2X,<sup>18</sup> with the standard 6-31+G(d,p) basis set, were used to treat the QM subset of atoms, as implemented in Mopac<sup>19</sup> and Gaussian 09,<sup>20</sup> respectively. The atom positions of all residues presented beyond 25 Å from the substrate were frozen and the same cut-offs as in MD simulations were applied for the nonbonding interactions.

**Potential Energy Surfaces.** Potential Energy Surfaces (PES) were explored by choosing and scanning the appropriate combination of internal coordinates ( $\xi_i$ ) assuming their dominant role in the shape of the reaction coordinate. Thus, a combination of different distances was controlled during the exploration of all four chemical steps being part of the complete reaction path. In the first step of the reaction, the PES was generated by controlling the distance between nitrogen, Nε atom of His399 and hydrogen, HG atoms of Ser189, together with the distance between oxygen, OG atom of Ser189 and carbonyl carbon, C1 atom of a substrate, directing acylation process. In the second step antisymmetric combination of nitrogen, Nε

atom and hydrogen HG, attached to His399 and this hydrogen atom and its acceptor, nitrogen, N4 atom of the substrate, together with carbon-nitrogen (C1-N4) bond of a substrate were controlled.

In order to explore all PESs, the harmonic constraint of  $5000 \text{ kJ}\cdot\text{mol}^{-1}\cdot\text{\AA}^{-2}$  was used to maintain the proper interatomic distances along the reaction coordinate, and a series of conjugate gradient optimizations and L-BFGS-B optimization algorithms<sup>21</sup> were applied to obtain the final potential energy of the minimized constrained geometry. The QM sub-set of atoms was described by the Austin Model 1 (AM1) semiempirical Hamiltonian. The distances evolution was controlled by applying a small size change of  $0.1 \text{ \AA}$  when the distance between two heavy atoms was explored, or  $0.05 \text{ \AA}$  when the transfer of light hydrogen atom was involved.

A micro-macro iteration optimization algorithm<sup>22,23</sup> together with the Baker's algorithm<sup>24,25</sup> was used to localize, optimize, and characterize the transition states (TS) and structures using a Hessian matrix containing all the coordinates of the QM subsystem, whereas the gradient norm of the remaining movable atoms was maintained less than  $0.25 \text{ kcal mol}^{-1} \text{ \AA}^{-1}$ . the Intrinsic Reaction Coordinate<sup>10</sup> (IRC) were traced down from located TSs to the connecting valleys in mass-weighted Cartesian coordinates. And the same micro-macro iteration optimization algorithm was used to optimize reactant complex (RC) and intermediates (Is). The existence of the saddle-points, as well as those located in minima, was confirmed by frequency calculation. Thus, for TS structures, only one imaginary value of frequency was registered, while for structures located in the minimum of the PESs no imaginary values were found.

**Free Energy Surfaces.** FESs were obtained, in terms of two-dimensional potential mean force (2D-PMF),<sup>26</sup> for every step of the reaction using the Umbrella Sampling approach<sup>26,27</sup> combined with the Weighted Histogram Analysis Method (WHAM).<sup>28</sup> The procedure for the PMF calculation is straightforward and requires a series of molecular dynamics simulations in which the distinguished reaction coordinate variable,  $\xi$ , is constrained around particular values. The values of the variables

sampled during the simulations are then pieced together to construct a distribution function from which the PMF is obtained as a function of the distinguished reaction coordinate ( $W(\xi)$ ). The PMF is related to the normalized probability of finding the system at a particular value of the chosen coordinate by eq 2:

$$W(\xi) = C - kT \ln \int \rho(r^N) \delta(\xi(r^N) - \xi) dr^{N-1} \quad (2)$$

The activation free energy can be then expressed as:

$$\Delta G^\ddagger(\xi) = W(\xi^\ddagger) - [W(\xi^R) + G_\xi(\xi^R)] \quad (3)$$

where the superscripts indicate the value of the reaction coordinate at the reactants (R), and at the TS ( $\ddagger$ ), and  $G_\xi(\xi^R)$  is the free energy associated with setting the reaction coordinate to a specific value at the reactant state. Normally this last term makes a small contribution, and the activation free energy is directly estimated from the PMF change between the maximum of the profile and the reactant's minimum:

$$\Delta G^\ddagger(\xi) \approx W(\xi^\ddagger) - W(\xi^R) = \Delta W^\ddagger(\xi) \quad (4)$$

The selection of the reaction coordinate is usually trivial when the mechanism can be driven by a single internal coordinate or a simple combination (as the antisymmetric combination of two interatomic distances). However, this is not the case for all possible steps of the reaction subject of study in this paper where many coordinates are participating. Instead, we were compelled to obtain a much more computationally demanding 2D-PMF using two coordinates:  $\xi_1$  and  $\xi_2$ . The 2D-PMF is related to the probability of finding the system at particular values of these two coordinates:

$$W(\xi) = C' - kT \ln \int \rho(r^N) \delta(\xi_1(r^N) - \xi_1) \delta(\xi_2(r^N) - \xi_2) dr^{N-2} \quad (5)$$

To estimate the activation free energy from this quantity, we recovered one-dimensional PMF changes tracing a maximum probability reaction path on the 2D-PMF surface and integrating over the perpendicular coordinate.

Thus, a series of MD simulations were performed adding a constraint for the selected reaction coordinates with an umbrella force constant of  $2500 \text{ kJ}\cdot\text{mol}^{-1}\cdot\text{\AA}^{-2}$ . In every window, QM/MM MD simulations were performed with a total of 5 ps of equilibration and 20 ps of production at 303 K using the Langevin-Verlet algorithm<sup>29</sup> with a time step of 1 fs. Structures obtained in previously computed PESs were used as starting points for the MD simulations in every window. Finally, the WHAM was computed with a tolerance of  $0.001 \text{ kcal}\cdot\text{mol}^{-1}$ . The overlapping between windows shown in Figure S13 is a representation of the reaction coordinates over time of every window.

**Spline corrections.** In order to improve lower quality results associated with the lower-level semiempirical calculations, high-level corrections were applied using Density Functional Theory (DFT). As already described in the literature,<sup>30,31</sup> a correction term  $S[\Delta E_{LL}^{HL}(\xi_1, \xi_2)]$  is interpolated to any value along reaction coordinates in the FES. A continuous energy function is used to obtain the corrected PMFs:

$$E = E_{LL/MM} + S[\Delta E_{LL}^{HL}(\xi_1, \xi_2)] \quad (6)$$

where  $S$  is the two-dimensional spline function and  $\Delta E_{LL}^{HL}$  is the difference between the energies obtained at low-level (LL) and high-level (HL) of the theory of the QM part. The AM1 semiempirical Hamiltonian was used as the LL method, while the DFT method was selected for the HL energy calculation. In particular, HL energy calculations were performed by means of the hybrid M06-2X functional using the standard 6-31+G(d,p) basis set. These calculations were carried out using the Gaussian09 program.

**Structural alignment of CALB and Bs2.** To compare the environment generated by the enzyme surrounding the substrate a structural alignment was done between Bs2 and CALB. For this purpose, TS1 structures localized at M06-2X/MM level in both systems were used. Due to the poor percentage of sequence identity between enzymes a structural alignment based on sequence similarity was unachievable.

For that reason, an alternative procedure was used involving the geometrical overlapping of the positions of atoms of the amide bond and the neighboring carbon atoms. Structures of protein were forced to align accordingly, which was achieved using a rotation quaternion around those selected atoms highlighted in Figure S14.

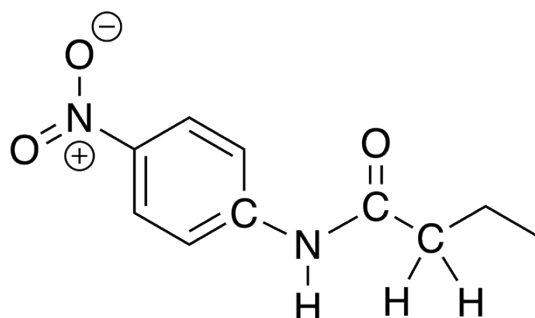

**Figure S14.** Structure of the substrate with highlighted atoms (in yellow) used as observed and reference points for geometrical overlapping.

The superimposition was done using quaternions implemented in QMCube.<sup>32</sup> This vector formulation for molecule rotations is useful in large vectorized systems. It basically assumes that the optimal superposition can be found by finding the normalized eigenvector of the smallest eigenvalue of the quaternion 4 x 4 matrix, where the components of this eigenvector represent the optimal orientation of the target structure towards the reference. Once the parameters of the quaternion are found, the molecule can be rotated applying the optimal rotation quaternion-derived matrix to the target molecule.<sup>33</sup>

When both proteins were aligned, structures were compared based on the position of the centers of mass of every residue inside each protein. Residues of Bs2 and CALB were paired based on the proximity of their centers of mass, i.e. the pair of a residue from Bs2 is the residue from CALB which center of mass lies the nearest to the tested residue. In order to reduce the error of alignment, the centers of mass were



averaged along a 20 ps constrained QM/MM MD on TS1 of both proteins. The pairing alignment is depicted in Figure S2.

**Electrostatic potential per residue.** The electrostatic potential generated on N $\epsilon$  of the catalytic His399 was computed. Only the residues whose center of mass lies within 15 Å of the center of mass of the substrate were considered. Electrostatic potential per residue ( $V_{res}$ ) was computed based on equation 6,

$$V_{res} = \sum_{i=1}^n \frac{q_i}{4\pi\epsilon \cdot r_i} \quad (6)$$

where n corresponds to the number of atoms in the residue,  $q_i$  is the charge of the atom taken from the OPLS-AA force field, and  $r_i$  is the distance between atom  $i$  and N $\epsilon$  of His399. Cut-offs of 14.5 and 16 Å were applied. The electrostatic potential per residue was averaged along a 20 ps constrained QM/MM MD simulation on TS1. The electrostatic potential per residue in CALB and Bs2 is depicted in Figure S3.

## STRUCTURES COORDINATES

**Table S8.** X, Y and Z coordinates of QM atoms for Transition State Structures optimized at M06-2X/MM level for the acylation step of the F398D Bs2 variant.

| Acylation step                                            |        |        |        |                                                           |        |        |        |
|-----------------------------------------------------------|--------|--------|--------|-----------------------------------------------------------|--------|--------|--------|
| Transition State 1 ( $\nu_i = -383.062 \text{ cm}^{-1}$ ) |        |        |        | Transition State 2 ( $\nu_i = -166.294 \text{ cm}^{-1}$ ) |        |        |        |
| Atoms                                                     | x      | y      | z      | Atoms                                                     | x      | y      | z      |
| C                                                         | 48.592 | 45.418 | 50.575 | C                                                         | 48.433 | 45.542 | 50.535 |
| H                                                         | 49.662 | 45.396 | 50.318 | H                                                         | 49.517 | 45.623 | 50.396 |
| H                                                         | 48.060 | 45.841 | 49.707 | H                                                         | 47.929 | 45.954 | 49.657 |
| O                                                         | 48.430 | 46.285 | 51.690 | O                                                         | 48.104 | 46.295 | 51.705 |
| H                                                         | 49.456 | 46.719 | 52.019 | H                                                         | 49.687 | 47.213 | 52.180 |
| C                                                         | 54.375 | 45.243 | 56.520 | C                                                         | 54.371 | 45.232 | 56.502 |
| H                                                         | 54.281 | 44.964 | 57.574 | H                                                         | 54.283 | 44.940 | 57.553 |
| H                                                         | 53.356 | 45.475 | 56.187 | H                                                         | 53.350 | 45.469 | 56.179 |
| C                                                         | 54.876 | 44.032 | 55.739 | C                                                         | 54.865 | 44.030 | 55.705 |
| H                                                         | 55.960 | 43.916 | 55.821 | H                                                         | 55.950 | 43.913 | 55.773 |
| H                                                         | 54.442 | 43.122 | 56.164 | H                                                         | 54.438 | 43.115 | 56.124 |
| C                                                         | 54.562 | 43.998 | 54.246 | C                                                         | 54.535 | 44.001 | 54.220 |
| O                                                         | 54.238 | 45.057 | 53.643 | O                                                         | 54.152 | 45.056 | 53.616 |
| O                                                         | 54.662 | 42.873 | 53.688 | O                                                         | 54.673 | 42.901 | 53.639 |
| C                                                         | 53.919 | 48.895 | 52.974 | C                                                         | 53.944 | 48.884 | 52.996 |
| H                                                         | 54.073 | 49.215 | 54.008 | H                                                         | 54.099 | 49.184 | 54.035 |
| H                                                         | 53.838 | 49.791 | 52.354 | H                                                         | 53.864 | 49.787 | 52.389 |
| C                                                         | 52.649 | 48.081 | 52.878 | C                                                         | 52.676 | 48.087 | 52.890 |
| N                                                         | 52.511 | 46.906 | 53.576 | N                                                         | 52.506 | 46.873 | 53.529 |
| H                                                         | 53.292 | 46.321 | 53.968 | H                                                         | 53.302 | 46.173 | 53.854 |
| C                                                         | 51.329 | 46.361 | 53.281 | C                                                         | 51.293 | 46.409 | 53.273 |
| H                                                         | 50.988 | 45.415 | 53.680 | H                                                         | 50.893 | 45.471 | 53.629 |
| N                                                         | 50.655 | 47.132 | 52.437 | N                                                         | 50.659 | 47.284 | 52.489 |
| C                                                         | 51.477 | 48.215 | 52.168 | C                                                         | 51.509 | 48.334 | 52.220 |
| H                                                         | 51.160 | 49.018 | 51.519 | H                                                         | 51.191 | 49.160 | 51.603 |
| C                                                         | 47.315 | 47.773 | 51.521 | C                                                         | 47.165 | 47.299 | 51.626 |
| C                                                         | 47.281 | 48.052 | 53.016 | C                                                         | 47.003 | 47.910 | 52.999 |
| H                                                         | 48.311 | 48.085 | 53.390 | H                                                         | 47.924 | 48.418 | 53.301 |
| H                                                         | 46.875 | 49.060 | 53.161 | H                                                         | 46.204 | 48.652 | 52.934 |
| C                                                         | 46.433 | 47.077 | 53.824 | C                                                         | 46.616 | 46.838 | 54.026 |
| C                                                         | 46.363 | 47.508 | 55.290 | C                                                         | 46.320 | 47.455 | 55.390 |
| H                                                         | 45.902 | 48.495 | 55.406 | H                                                         | 45.464 | 48.135 | 55.353 |
| H                                                         | 45.775 | 46.805 | 55.886 | H                                                         | 46.092 | 46.683 | 56.130 |
| H                                                         | 47.365 | 47.560 | 55.730 | H                                                         | 47.179 | 48.024 | 55.757 |
| H                                                         | 45.426 | 47.022 | 53.395 | H                                                         | 45.745 | 46.275 | 53.668 |
| H                                                         | 46.864 | 46.075 | 53.734 | H                                                         | 47.437 | 46.118 | 54.110 |
| O                                                         | 46.322 | 47.400 | 50.873 | O                                                         | 46.259 | 47.255 | 50.790 |
| N                                                         | 48.296 | 48.615 | 50.794 | N                                                         | 48.552 | 48.624 | 50.721 |
| H                                                         | 48.815 | 48.115 | 50.082 | H                                                         | 49.171 | 48.183 | 50.038 |
| C                                                         | 48.279 | 49.969 | 50.657 | C                                                         | 48.486 | 49.927 | 50.517 |
| C                                                         | 49.254 | 50.573 | 49.814 | C                                                         | 49.334 | 50.623 | 49.581 |
| C                                                         | 49.393 | 51.940 | 49.752 | C                                                         | 49.410 | 51.987 | 49.577 |
| C                                                         | 48.546 | 52.757 | 50.514 | C                                                         | 48.595 | 52.751 | 50.445 |
| C                                                         | 47.505 | 52.203 | 51.263 | C                                                         | 47.624 | 52.109 | 51.245 |
| C                                                         | 47.356 | 50.830 | 51.310 | C                                                         | 47.558 | 50.743 | 51.263 |
| H                                                         | 46.521 | 50.419 | 51.861 | H                                                         | 46.816 | 50.249 | 51.877 |
| H                                                         | 46.827 | 52.851 | 51.813 | H                                                         | 46.952 | 52.708 | 51.852 |
| N                                                         | 48.800 | 54.168 | 50.593 | N                                                         | 48.838 | 54.121 | 50.608 |
| O                                                         | 49.705 | 54.646 | 49.898 | O                                                         | 49.736 | 54.662 | 49.925 |
| O                                                         | 48.127 | 54.843 | 51.358 | O                                                         | 48.185 | 54.760 | 51.439 |
| H                                                         | 50.170 | 52.382 | 49.140 | H                                                         | 50.101 | 52.495 | 48.916 |
| H                                                         | 49.926 | 49.945 | 49.236 | H                                                         | 49.969 | 50.042 | 48.915 |
| H                                                         | 54.745 | 48.390 | 52.724 | H                                                         | 54.763 | 48.375 | 52.732 |
| H                                                         | 54.945 | 46.063 | 56.473 | H                                                         | 54.943 | 46.051 | 56.460 |
| H                                                         | 48.295 | 44.474 | 50.721 | H                                                         | 48.201 | 44.582 | 50.688 |

**Table S9.** X, Y and Z coordinates of QM atoms for Transition State Structures optimized at M06-2X/MM level for the acylation step of the F398D-H<sup>+</sup> Bs2 variant.

| Acylation step                                             |        |        |        |                                                            |        |        |        |
|------------------------------------------------------------|--------|--------|--------|------------------------------------------------------------|--------|--------|--------|
| Transition State 1 ( $\nu_i = -1051.441 \text{ cm}^{-1}$ ) |        |        |        | Transition State 2 ( $\nu_i = -1007.015 \text{ cm}^{-1}$ ) |        |        |        |
| Atoms                                                      | x      | y      | z      | Atoms                                                      | x      | y      | z      |
| C                                                          | 44.224 | 43.709 | 52.695 | C                                                          | 44.120 | 43.553 | 52.600 |
| H                                                          | 45.016 | 44.388 | 53.034 | H                                                          | 44.818 | 44.208 | 53.136 |
| H                                                          | 43.741 | 44.205 | 51.837 | H                                                          | 43.702 | 44.112 | 51.754 |
| O                                                          | 43.277 | 43.587 | 53.748 | O                                                          | 43.094 | 43.153 | 53.494 |
| H                                                          | 43.563 | 44.229 | 54.828 | H                                                          | 42.608 | 45.205 | 55.131 |
| C                                                          | 46.591 | 41.656 | 59.922 | C                                                          | 46.585 | 41.711 | 59.882 |
| H                                                          | 46.396 | 40.633 | 60.262 | H                                                          | 46.441 | 40.677 | 60.215 |
| H                                                          | 45.929 | 41.798 | 59.060 | H                                                          | 45.906 | 41.841 | 59.032 |
| C                                                          | 48.059 | 41.728 | 59.453 | C                                                          | 48.037 | 41.859 | 59.389 |
| H                                                          | 48.748 | 41.867 | 60.293 | H                                                          | 48.727 | 42.068 | 60.213 |
| H                                                          | 48.318 | 40.769 | 58.993 | H                                                          | 48.354 | 40.906 | 58.954 |
| C                                                          | 48.442 | 42.787 | 58.415 | C                                                          | 48.341 | 42.899 | 58.303 |
| O                                                          | 47.692 | 43.766 | 58.202 | O                                                          | 47.502 | 43.785 | 58.014 |
| O                                                          | 49.528 | 42.592 | 57.771 | O                                                          | 49.460 | 42.761 | 57.701 |
| C                                                          | 44.854 | 46.163 | 59.331 | C                                                          | 44.963 | 46.184 | 59.563 |
| H                                                          | 44.434 | 45.531 | 60.117 | H                                                          | 44.626 | 45.458 | 60.307 |
| H                                                          | 44.290 | 47.099 | 59.343 | H                                                          | 44.419 | 47.111 | 59.762 |
| C                                                          | 44.606 | 45.457 | 57.988 | C                                                          | 44.516 | 45.693 | 58.195 |
| N                                                          | 45.247 | 44.271 | 57.714 | N                                                          | 44.977 | 44.533 | 57.615 |
| H                                                          | 46.099 | 43.911 | 58.201 | H                                                          | 45.818 | 44.014 | 57.927 |
| C                                                          | 44.870 | 43.824 | 56.519 | C                                                          | 44.316 | 44.326 | 56.468 |
| H                                                          | 45.242 | 42.917 | 56.068 | H                                                          | 44.483 | 43.488 | 55.806 |
| N                                                          | 43.978 | 44.634 | 55.967 | N                                                          | 43.425 | 45.285 | 56.257 |
| C                                                          | 43.806 | 45.678 | 56.879 | C                                                          | 43.558 | 46.161 | 57.325 |
| H                                                          | 43.150 | 46.508 | 56.666 | H                                                          | 42.972 | 47.066 | 57.399 |
| C                                                          | 41.489 | 44.046 | 53.220 | C                                                          | 41.788 | 43.751 | 53.327 |
| C                                                          | 40.814 | 43.087 | 54.194 | C                                                          | 40.915 | 42.908 | 54.281 |
| H                                                          | 41.436 | 42.997 | 55.089 | H                                                          | 41.515 | 42.644 | 55.158 |
| H                                                          | 39.869 | 43.531 | 54.527 | H                                                          | 40.060 | 43.482 | 54.648 |
| C                                                          | 40.543 | 41.728 | 53.554 | C                                                          | 40.413 | 41.647 | 53.579 |
| C                                                          | 39.713 | 40.809 | 54.446 | C                                                          | 39.484 | 40.810 | 54.455 |
| H                                                          | 40.217 | 40.615 | 55.398 | H                                                          | 39.988 | 40.493 | 55.374 |
| H                                                          | 38.736 | 41.254 | 54.669 | H                                                          | 38.593 | 41.379 | 54.743 |
| H                                                          | 39.538 | 39.845 | 53.960 | H                                                          | 39.151 | 39.909 | 53.932 |
| H                                                          | 40.023 | 41.886 | 52.602 | H                                                          | 39.894 | 41.947 | 52.662 |
| H                                                          | 41.498 | 41.258 | 53.294 | H                                                          | 41.271 | 41.048 | 53.255 |
| O                                                          | 41.418 | 43.853 | 51.993 | O                                                          | 41.390 | 43.874 | 52.105 |
| N                                                          | 41.587 | 45.436 | 53.676 | N                                                          | 42.021 | 45.203 | 54.016 |
| H                                                          | 42.500 | 45.899 | 53.528 | H                                                          | 42.773 | 45.693 | 53.489 |
| C                                                          | 40.541 | 46.277 | 53.893 | C                                                          | 40.916 | 46.117 | 54.079 |
| C                                                          | 40.840 | 47.631 | 54.214 | C                                                          | 41.188 | 47.419 | 54.527 |
| C                                                          | 39.857 | 48.508 | 54.599 | C                                                          | 40.159 | 48.306 | 54.800 |
| C                                                          | 38.528 | 48.062 | 54.679 | C                                                          | 38.847 | 47.873 | 54.614 |
| C                                                          | 38.182 | 46.772 | 54.272 | C                                                          | 38.550 | 46.630 | 54.067 |
| C                                                          | 39.170 | 45.902 | 53.843 | C                                                          | 39.593 | 45.760 | 53.775 |
| H                                                          | 38.878 | 44.927 | 53.474 | H                                                          | 39.379 | 44.807 | 53.311 |
| H                                                          | 37.141 | 46.463 | 54.285 | H                                                          | 37.519 | 46.344 | 53.890 |
| N                                                          | 37.546 | 48.930 | 55.255 | N                                                          | 37.756 | 48.713 | 55.090 |
| O                                                          | 36.488 | 48.457 | 55.666 | O                                                          | 36.640 | 48.222 | 55.173 |
| O                                                          | 37.800 | 50.126 | 55.349 | O                                                          | 38.006 | 49.863 | 55.420 |
| H                                                          | 40.102 | 49.525 | 54.881 | H                                                          | 40.362 | 49.298 | 55.185 |
| H                                                          | 41.878 | 47.947 | 54.184 | H                                                          | 42.225 | 47.713 | 54.674 |
| H                                                          | 45.807 | 46.345 | 59.577 | H                                                          | 45.936 | 46.344 | 59.731 |
| H                                                          | 46.321 | 42.276 | 60.659 | H                                                          | 46.306 | 42.313 | 60.631 |
| H                                                          | 44.673 | 42.872 | 52.383 | H                                                          | 44.625 | 42.750 | 52.283 |

**Table S10.** X, Y and Z coordinates of QM atoms for Transition State Structures optimized at M06-2X/MM level for the acylation step of the reaction of the D66I/L335K Bs2 variant.

| Acylation step                                            |        |        |        |                                                           |        |        |        |
|-----------------------------------------------------------|--------|--------|--------|-----------------------------------------------------------|--------|--------|--------|
| Transition State 1 ( $\nu_i = -672.467 \text{ cm}^{-1}$ ) |        |        |        | Transition State 2 ( $\nu_i = -164.117 \text{ cm}^{-1}$ ) |        |        |        |
| Atoms                                                     | x      | y      | z      | Atoms                                                     | x      | y      | z      |
| C                                                         | 49.182 | 44.719 | 50.456 | C                                                         | 48.981 | 44.552 | 50.594 |
| H                                                         | 50.226 | 44.892 | 50.135 | H                                                         | 50.054 | 44.765 | 50.484 |
| H                                                         | 48.556 | 45.251 | 49.722 | H                                                         | 48.465 | 45.130 | 49.825 |
| O                                                         | 48.999 | 45.298 | 51.728 | O                                                         | 48.584 | 44.996 | 51.886 |
| H                                                         | 50.048 | 45.931 | 52.289 | H                                                         | 49.691 | 47.074 | 52.602 |
| C                                                         | 56.620 | 42.266 | 55.271 | C                                                         | 56.638 | 42.244 | 55.295 |
| H                                                         | 57.285 | 41.778 | 54.562 | H                                                         | 57.297 | 41.782 | 54.563 |
| H                                                         | 56.600 | 41.615 | 56.154 | H                                                         | 56.604 | 41.553 | 56.145 |
| C                                                         | 55.225 | 42.300 | 54.624 | C                                                         | 55.240 | 42.304 | 54.642 |
| H                                                         | 54.794 | 41.296 | 54.679 | H                                                         | 54.810 | 41.297 | 54.674 |
| H                                                         | 54.528 | 42.972 | 55.132 | H                                                         | 54.545 | 42.966 | 55.164 |
| C                                                         | 55.293 | 42.651 | 53.140 | C                                                         | 55.262 | 42.681 | 53.161 |
| O                                                         | 54.604 | 43.623 | 52.716 | O                                                         | 54.605 | 43.684 | 52.783 |
| O                                                         | 55.996 | 41.942 | 52.379 | O                                                         | 55.892 | 41.934 | 52.354 |
| C                                                         | 54.411 | 47.214 | 54.198 | C                                                         | 54.512 | 47.275 | 54.324 |
| H                                                         | 54.512 | 46.974 | 55.260 | H                                                         | 54.611 | 46.983 | 55.372 |
| H                                                         | 54.380 | 48.303 | 54.117 | H                                                         | 54.554 | 48.366 | 54.281 |
| C                                                         | 53.089 | 46.644 | 53.702 | C                                                         | 53.167 | 46.834 | 53.809 |
| N                                                         | 52.913 | 45.278 | 53.650 | N                                                         | 52.856 | 45.515 | 53.571 |
| H                                                         | 53.678 | 44.558 | 53.609 | H                                                         | 53.531 | 44.727 | 53.543 |
| C                                                         | 51.718 | 45.010 | 53.127 | C                                                         | 51.613 | 45.460 | 53.061 |
| H                                                         | 51.330 | 44.018 | 52.946 | H                                                         | 51.115 | 44.541 | 52.785 |
| N                                                         | 51.074 | 46.134 | 52.856 | N                                                         | 51.091 | 46.668 | 52.970 |
| C                                                         | 51.914 | 47.179 | 53.216 | C                                                         | 52.052 | 47.539 | 53.434 |
| H                                                         | 51.617 | 48.212 | 53.117 | H                                                         | 51.883 | 48.605 | 53.468 |
| C                                                         | 47.515 | 46.489 | 51.918 | C                                                         | 47.638 | 46.020 | 52.072 |
| C                                                         | 46.965 | 45.800 | 53.156 | C                                                         | 47.055 | 45.819 | 53.461 |
| H                                                         | 45.996 | 46.286 | 53.351 | H                                                         | 46.428 | 46.693 | 53.680 |
| H                                                         | 46.748 | 44.770 | 52.858 | H                                                         | 46.378 | 44.963 | 53.333 |
| C                                                         | 47.795 | 45.816 | 54.434 | C                                                         | 48.022 | 45.535 | 54.601 |
| C                                                         | 47.070 | 45.048 | 55.537 | C                                                         | 47.256 | 45.026 | 55.818 |
| H                                                         | 46.894 | 44.009 | 55.238 | H                                                         | 46.720 | 44.103 | 55.571 |
| H                                                         | 47.634 | 45.048 | 56.471 | H                                                         | 47.915 | 44.824 | 56.664 |
| H                                                         | 46.091 | 45.496 | 55.743 | H                                                         | 46.511 | 45.760 | 56.144 |
| H                                                         | 48.770 | 45.363 | 54.233 | H                                                         | 48.745 | 44.784 | 54.267 |
| H                                                         | 47.985 | 46.839 | 54.782 | H                                                         | 48.594 | 46.434 | 54.859 |
| O                                                         | 46.869 | 46.370 | 50.835 | O                                                         | 46.810 | 46.281 | 51.143 |
| N                                                         | 48.131 | 47.722 | 52.211 | N                                                         | 48.676 | 47.490 | 52.366 |
| H                                                         | 48.244 | 47.977 | 53.188 | H                                                         | 48.376 | 47.936 | 53.240 |
| C                                                         | 48.510 | 48.685 | 51.283 | C                                                         | 48.815 | 48.485 | 51.367 |
| C                                                         | 48.365 | 50.045 | 51.611 | C                                                         | 48.327 | 49.783 | 51.575 |
| C                                                         | 48.767 | 51.032 | 50.724 | C                                                         | 48.601 | 50.797 | 50.665 |
| C                                                         | 49.334 | 50.656 | 49.511 | C                                                         | 49.351 | 50.490 | 49.534 |
| C                                                         | 49.509 | 49.315 | 49.167 | C                                                         | 49.827 | 49.204 | 49.285 |
| C                                                         | 49.084 | 48.331 | 50.046 | C                                                         | 49.549 | 48.201 | 50.204 |
| H                                                         | 49.240 | 47.283 | 49.820 | H                                                         | 49.967 | 47.208 | 50.069 |
| H                                                         | 50.028 | 49.068 | 48.246 | H                                                         | 50.463 | 49.027 | 48.423 |
| N                                                         | 49.793 | 51.678 | 48.584 | N                                                         | 49.721 | 51.557 | 48.606 |
| O                                                         | 49.847 | 52.845 | 48.981 | O                                                         | 49.603 | 52.720 | 48.989 |
| O                                                         | 50.099 | 51.346 | 47.455 | O                                                         | 50.129 | 51.248 | 47.504 |
| H                                                         | 48.648 | 52.081 | 50.971 | H                                                         | 48.275 | 51.815 | 50.846 |
| H                                                         | 47.939 | 50.332 | 52.568 | H                                                         | 47.795 | 50.023 | 52.491 |
| H                                                         | 55.217 | 46.873 | 53.715 | H                                                         | 55.287 | 46.905 | 53.812 |
| H                                                         | 57.020 | 43.146 | 55.525 | H                                                         | 57.052 | 43.101 | 55.601 |
| H                                                         | 49.012 | 43.738 | 50.360 | H                                                         | 48.846 | 43.571 | 50.455 |

## EXPERIMENTAL METHODS

**General information.** Deionized water was obtained by an *Elga PURELAB Option* system (15 M $\Omega$ ·cm). Analytical Thin Layer Chromatography (TLC) was carried out with silica gel 60 F254 aluminum sheets from *Merck*. Detection was carried out using UV light ( $\lambda = 254$  nm and 366 nm), followed by immersion in permanganate or cerium ammonium molybdate staining solution with subsequent development via careful heating with a heat gun. Flash column chromatography was performed using silica gel (pore size 60 Å, 0.040-0.063 mm). *N*-(4-nitrophenyl)-butyramide was synthesized using a known procedure.<sup>9</sup> All other solvents and reagents were obtained from commercial sources and used as received.

Plasmid miniprep-kit and gel extraction-kit were purchased from *Qiagen*. DNA oligos were purchased from *Sigma-Aldrich*. The gene encoding for wild-type Bs2<sup>1</sup> with a C-terminal His-tag (see below) was purchased as a double-stranded fragment from *Thermo Fisher Scientific GeneArt*. Gibson Assembly was performed using *New England Biolabs NEBuilder<sup>®</sup> HiFi DNA Assembly* master mix. Restriction enzymes and required reagents were obtained from *Thermo Fisher Scientific*. *Takara PrimeSTAR Max* was employed for site-directed mutagenesis. All kits and enzymes were used exactly following the manufacturers' protocols. DNA sequencing of constructed plasmids and mutants was obtained from *Eurofins Genomics* using T7 promoter and terminator primers.

A *VWR 3510* benchtop pH Meter connected to a *Jenway* micro pH electrode or a *VWR Universal* pH electrode were used for the pH adjustment of buffers and reaction mixtures employing either 1.0 M or 0.1 M sodium hydroxide solution or hydrochloric acid.

Size exclusion chromatography was performed using a *GE Healthcare ÄKTA Purifier* workstation or a *Bio-Rad NGC Medium-Pressure Liquid Chromatography System*.

Protein concentrations were determined using a *Thermo Scientific NanoDrop One* spectrophotometer measuring the absorption at 280 nm using the extinction coefficients obtained from <https://web.expasy.org/protparam/>.

Protein liquid chromatography-mass spectrometry (LC-MS) was performed on a *Waters Acquity H-Class UPLC* system combined with a *Waters Synapt G2-Si* quadrupole time of flight mass spectrometer. A *Waters Acquity UPLC Protein C4 BEH* column 300 Å, 1.7 µm (2.1 × 100 mm) held at 60 °C was applied. A flow rate of 0.2 mL/min and the gradient of eluents A and B highlighted below were employed.

| Time / min | A (H <sub>2</sub> O, 0.1% CHO <sub>2</sub> H) / % | B (ACN, 0.1% CHO <sub>2</sub> H) / % |
|------------|---------------------------------------------------|--------------------------------------|
| 0          | 95                                                | 5                                    |
| 3          | 95                                                | 5                                    |
| 50         | 35                                                | 65                                   |
| 52         | 3                                                 | 97                                   |
| 54         | 3                                                 | 97                                   |
| 56         | 95                                                | 5                                    |
| 60         | 95                                                | 5                                    |

The data was collected in positive electrospray ionization mode and analyzed using *Waters MassLynx 4.1*. Deconvoluted mass spectra were generate using the maximum entropy 1 (*MaxEnt 1*) software.

**Cloning, expression and purification of recombinant proteins.** The gene encoding for the wild-type Bs2 with a C-terminal linker and His-tag (GSSHHHHHSSG), and 27 and 20 bases either side complimentary to the vector was purchased as a double-stranded fragment. After a *NcoI* and *BamHI* restriction enzyme digested pET28a vector the wild-type Bs2 gene was cloned in-between by Gibson assembly. The incorporation of the wild-type Bs2 gene was confirmed by DNA sequencing. Finally, Bs2 F398D was prepared by site-directed mutagenesis.

The plasmid containing the gene for Bs2 F398D was transformed into Ca<sup>2+</sup> chemically competent BL21 (DE3) cells and grown on LB agar plates supplemented with kanamycin (50 µg/mL) at 37 °C overnight. One colony from the plate was picked to inoculate a 10 mL LB starter culture containing kanamycin (50 µg/mL) and grown at 37 °C and 180 rpm overnight. The starter culture was diluted into 1 L of fresh LB media containing kanamycin (50 µg/mL). The cells were grown at 37 °C and 200 rpm, until they reached an OD<sub>600</sub> of 0.8, and IPTG was added to reach a final concentration of 1.0 mM. The cells were then incubated overnight at 20 °C. The cultures were harvested by centrifugation (4,000 rpm, 4 °C, 30 min) and the dry pellet was stored at -20 °C.

The pellet was subjected to a freeze-thaw cycle, resuspended in 25 mL of lysis buffer 1 (50 mM NaP<sub>i</sub>, 300 mM NaCl, pH 7.5) and lysed by sonication (7 min, 5 s on, 10 s off). The insoluble fraction was removed by centrifugation at 18000 rpm for 25 min at 4 °C. The supernatant was mixed with 3 mL of Ni-NTA affinity resin for His-tag affinity purification which was equilibrated with the lysis buffer. After incubation at 4 °C for 0.5 h the resin was washed twice with 1.5 volumes of resin wash buffer 1 (50 mM NaP<sub>i</sub>, 300 mM NaCl, 10 mM imidazole, pH 7.5). The protein was eluted with elution buffer (5× resin volume, 50 mM NaP<sub>i</sub>, 300 mM NaCl, 250 mM imidazole, pH 7.5). Samples of the wash and elution fractions were collected and run on SDS-PAGE gel (12% w/v). The elution fractions containing the respective Bs2 variant were pooled and concentrated to 5 mL using *Amicon* ultra centrifugation with a 10 kDa cutoff. The concentrated protein solution was applied to size exclusion chromatography (*Generon ProSEC 26/60 3-70 HR* column, 50 mM NaP<sub>i</sub>, pH 7.0). Fractions containing protein (analysis by following 280 nm UV trace) were collected and the samples loaded on SDS-PAGE to check the purity of the protein (12% w/v). Fractions containing the respective Bs2 variant were pooled, transferred to a centrifugal concentrator with a 10 kDa cutoff, and were concentrated to 15–20 mg/mL as determined by nanodrop measurement at 280 nm, with  $\epsilon_{280} = 80330 \text{ M}^{-1} \text{ cm}^{-1}$  calculated using <https://web.expasy.org/protparam>.

The protein solutions were stored at 4 °C until further usage within a week. It should be noted that the solutions showed no significant loss in activity over 4 weeks (longer stability has not been monitored) and only minimal protein precipitation was observed.

**Site-directed mutagenesis.** The F398D mutation was introduced by site-directed mutagenesis PCR using *Takara PrimeSTAR Max* polymerase and the accompanying buffers, dNTPs and primers mentioned below. A 50 µL PCR reaction was prepared according to the instructions, the reaction mixture was distributed equally (12.5 µL) over 4 PCR tubes, and four different annealing temperatures in 2 °C increments were used. The PCR products were analyzed by agarose gel, correct size bands extracted, and clones of each plasmid sent for DNA sequencing. Primers used are given in the following with the site of mutation marked in bold red.

Forward primer: ACCTCCGTATAACAAAGCA**GAT**CATGCACTGG

Reverse primer: CTTTGTATACGGAGGTTTTTTCGGATGCC

### **Nucleotide sequence.**

```
ATGACCCACCAGATTGTTACACACAGTATGGTAAAGTGAAAGGCACCACCGAAAATGGTGTTCATAAA
TGGAAAGGTATCCCGTATGCAAAACCGCCTGTTGGTCAGTGGCGTTTTAAAGCACCGGAACCGCCTGAA
GTTTGGGAAGATGTTCTGGATGCAACCGCATATGGTAGCATTGTCCGCAGCCGAGCGATCTGCTGAGC
CTGAGCTATACCGAACTGCCTCGTCAGAGCGAAGATTGTCTGTATGTTAATGTTTTTGCACCGGATACG
CCGAGCAAAAATCTGCCGTTATGGTTTGGATTCATGGTGGTGCATTTTATCTTGGTGCAGGTAGCGAA
CCGCTGTATGATGGTAGCAAACCTGGCAGCACAGGGTGAAGTTATTGTTGTTACCCTGAATTATCGTCTG
GGTCCGTTTGGTTTTCTGCATCTGAGCAGCTTTAATGAAGCCTATAGCGATAATCTGGGTCTGCTGGAT
CAGGCAGCAGCACTGAAATGGGTTCGTGAAAACATTAGCGCATTTGGTGGTGCATCCGGATAATGTTACC
GTTTTTGGTCAAAGTGCCGGTGGTATGAGCATTGCAGCACTGCTGGCCATGCCTGCAGCAAAAGGTCTG
TTTCAGAAAGCAATTATGGAAAGCGGTGCAAGCCGTACCATGACCAAAGAACAGGCAGCAAGTACCAGC
GCAGCATTCTGCAGGTTCTGGGTATTAATGAAGGTCAGCTGGATAAACTGCATAACCGTTAGCGCAGAA
GATTTACTGAAAGCAGCAGATCAGCTGCGTATTGCAGAAAAAGAAAACATCTTTCAGCTGTTTTTTCAG
CCTGCACTGGATCCGAAAACACTGCCGGAAGAACCGGAAAAAGCAATTGCAGAAGGTGCAGCAAGCGGT
ATTCCGCTGCTGATTGGTACAACCCGTGATGAAGGTTACCTGTTTTTTACTCCGGATAGTGATGTTTCA
AGCCAAGAAACCTGGATGCAGCCCTGGAATATCTGCTGGGTAAACCGCTGGCCGAAAAAGTTGCAGAT
CTGTATCCGCGTAGCCTGGAAAGCCAGATTCATATGATGACGGATCTGCTGTTTTGGCGTCCGGCAGTT
GCATATGCCAGCGCACAGAGCCATTATGCACCGGTTTGGATGTATCGTTTTGATTGGCATCCGAAAAAA
```



CCTCCGTATAACAAAGCA**TTT**CATGCACTGGAAGTCCCGTTTGTGTTTGGTAATCTGGATGGTCTGGAA  
CGTATGGCAAAGCAGAAATTACCGATGAAGTGAAACAAGTGGAGCCATACCATTTCAGAGCGCATGGATT  
ACCTTTGCAAAAACCGGTAATCCGAGCACCGAAGCAGTTAATTGGCCTGCATATCATGAAGAAACCCGT  
GAAACCCTGATTCTGGATAGCGAAATTACCATTGAAAATGATCCGGAAAGCGAGAAACGTCAGAAACTG  
TTTCCGAGCAAAGGTGAAGGTAGCAGCCATCACCATCATCATCATAGCAGTGGTTAA

### Protein sequence.

MTHQIVTTQYGVKVKGTTENGVHKWKGIPYAKPPVQWRFKAPEPPEVWEDVLDATAYGSICPQPSDLLS  
LSYTELPRQSEDCLYVNVFAPDTPSKNLPVMVWIHGGAFFYLGAGSEPLYDGSKLAAQGEVIVVTLNYRL  
GPFGLHLSSFNEAYSNDLGLLDQAAALKWVRENISAFGGDPDNVTVFGESAGGMSIAALLAMPAAKGL  
FQKAIMESGASRTMTKEQAASTSAAFLQVLGINEGQLDKLHTVSAEDLLKAADQLRIAENENIFQLFFQ  
PALDPKTLPEEPEKAI AEGAASGIPLLIGTTRDEGYLFFTPDSVHSQETLDAALEYLLGKPLAEKVAD  
LYPRSLESQIHMMTDLLFWRPAVAYASAQSHYAPVWMYRFDWHPKKPPYNKA**F**HALELPFVFGNLDGLE  
RMAKAEITDEVKQLSHTIQSAWITFAKTGNPSTEAVNWPAYHEETRETLILDSEITIENDPESEKRQKL  
FPSKGESSHHHHHSSG\*

**Protein Mass.** wild-type Bs2 (-Met) = 55140.21 Da  
Bs2 F398D (-Met) = 55108.12 Da

**96 well-plate kinetic assay.** Stock solutions of the Bs2 variant (in 50 mM NaP<sub>i</sub>, pH 7.0) and *N*-(4-nitrophenyl)-butyramide (in DMSO) were prepared. The protein stock solution was kept on ice until use and was freshly prepared before each usage. DMSO and substrate stock solution were added to wells of a 96 transparent well-plate to a total of 15 µL. Buffer (50 mM NaP<sub>i</sub>, pH 7.0) was added to a total volume of 135 µL (150 µL in case of controls to monitor substrate stability). The plate was transferred into a platereader, double orbitally shaken for 5 s and the absorption at  $\lambda_{\text{Ex}} = 405$  nm measured to check correct substrate distribution. This data point is included in the kinetic profiles as start point, but not included in the linear fits. Then 15 µL of protein stock solution were added to each well except the enzyme free controls within 5 min. Final assay conditions were 150 µL volume, 10% DMSO, *N*-(4-nitrophenyl)-butyramide (10, 50, 100, 250 500, 1000, 2000, 3000 µM), 20 µg/mL protein. The plate was sealed with an airtight and UV-Vis transparent self-adhesive plastic cover sheet. After sealing, the plate was placed into the plate reader and the assay was monitored using the following program:

Temperature: 21.0 ± 1.0 °C

|                                    |              |
|------------------------------------|--------------|
| Number of repeats:                 | 42           |
| Delay between repeats:             | 1200 s       |
| Shaking duration:                  | 5.0 s        |
| Shaking diameter:                  | 0.70 mm      |
| Shaking type:                      | Double orbit |
| Delay duration:                    | 5.0 s        |
| Wavelength $\lambda_{\text{EX}}$ : | 405 nm       |

**Kinetic assay analysis.** In order to convert the absorption reading obtained from the kinetic assay into concentrations for the determination of kinetic data a calibration curve was generated using 10, 50, 100, 250 500, 1000, 2000, 3000  $\mu\text{M}$  of 4-nitroaniline in 150  $\mu\text{L}$  buffer (50 mM  $\text{NaP}_i$ , pH 7.0, 10% DMSO). Raw absorption data was converted into product concentrations and data analysis with *Origin 2020* was performed to obtain kinetic data assuming Michaelis–Menten kinetics. The maximum velocities  $v_{\text{max}}$  were obtained from the linear range of the product concentration vs. time plots and used to calculate  $k_{\text{cat}}$  and  $K_M$  for Bs2 F398D applying the enzyme kinetics / Michaelis–Menten kinetics fitting functions implemented in the software.

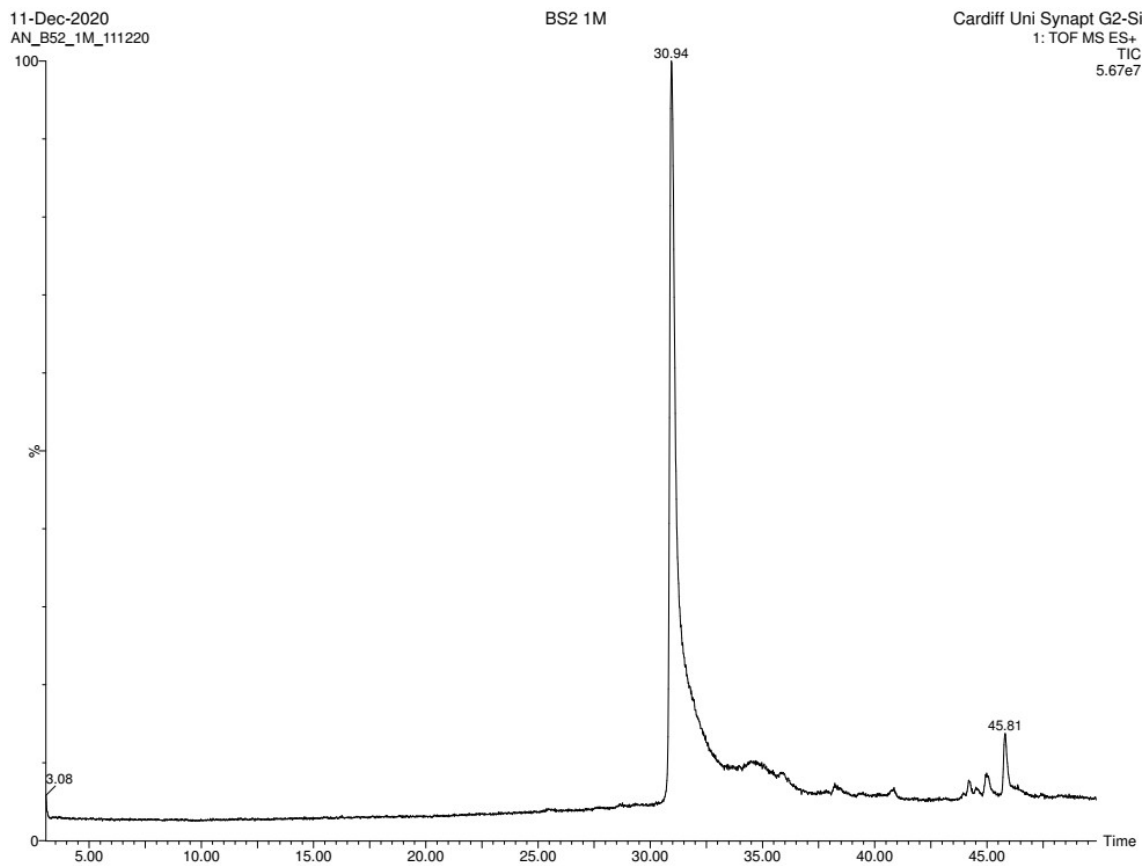

**Figure S15.** LC chromatogram of purified Bs2 F398D.

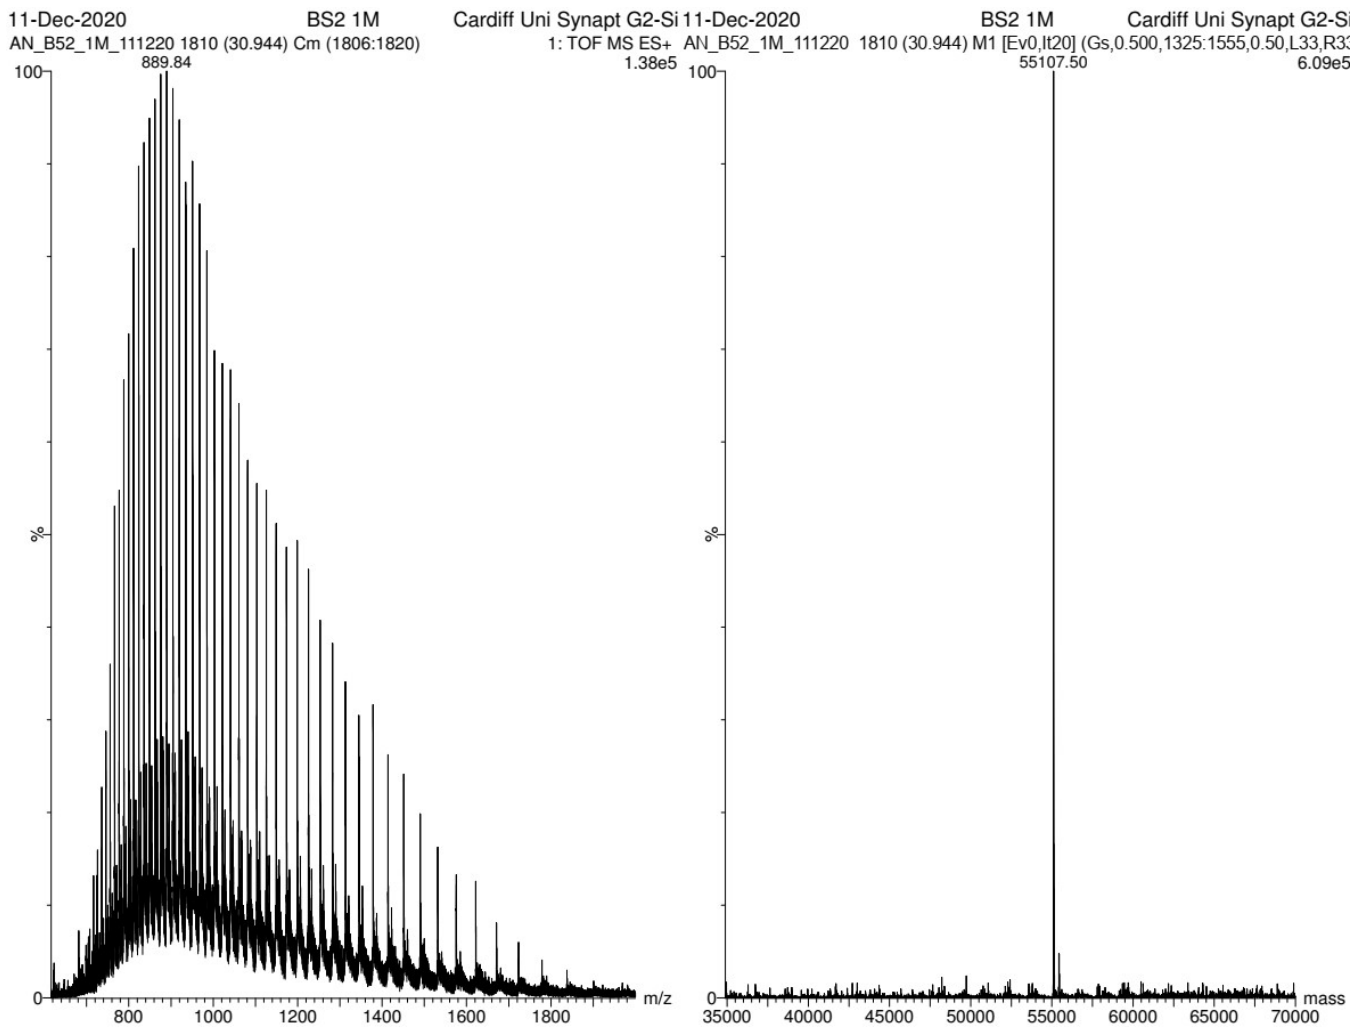

Figure S16. Raw and deconvoluted mass spectrum of purified Bs2 F398D.

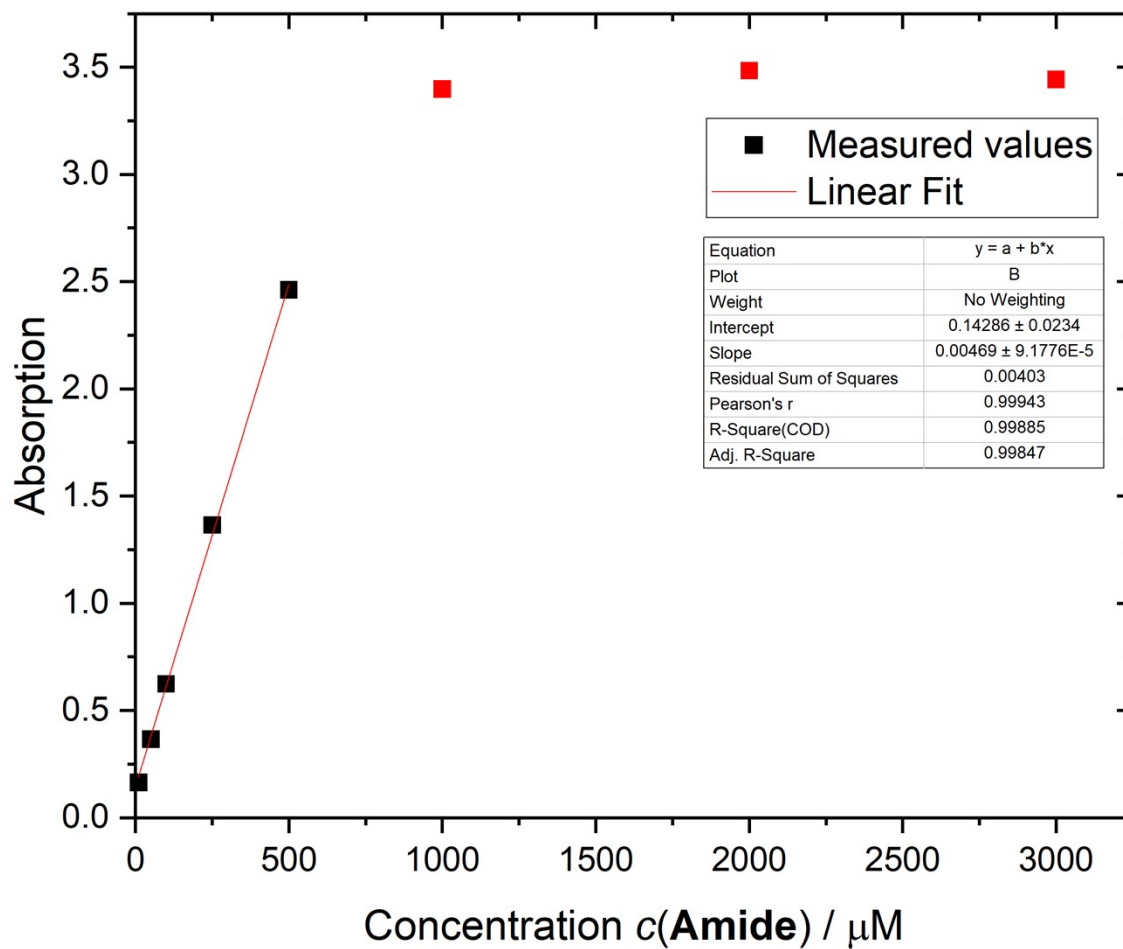

**Figure S17.** Calibration curve for the 4-nitroaniline concentration in the assay mixture.

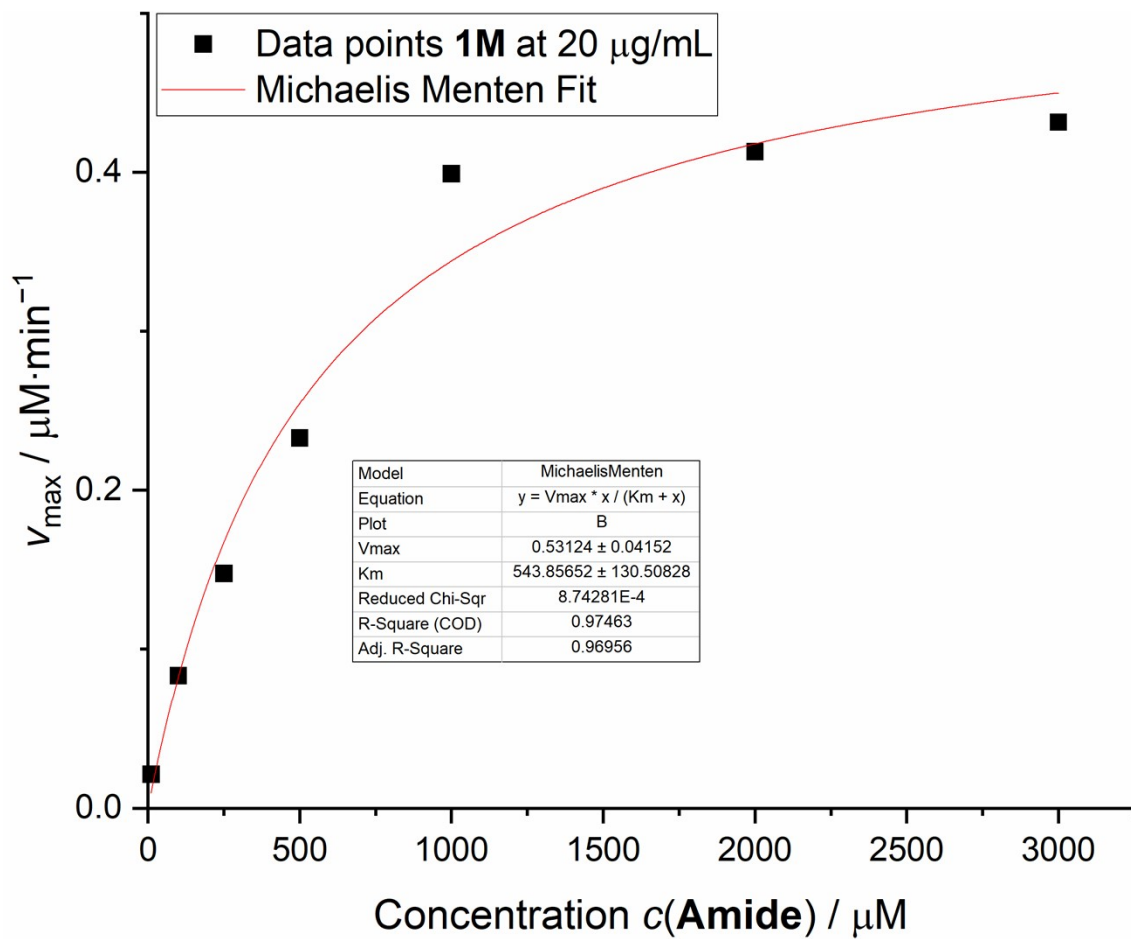

**Figure S18.** Michaelis–Menten plot for Bs2 F398D, run 1.

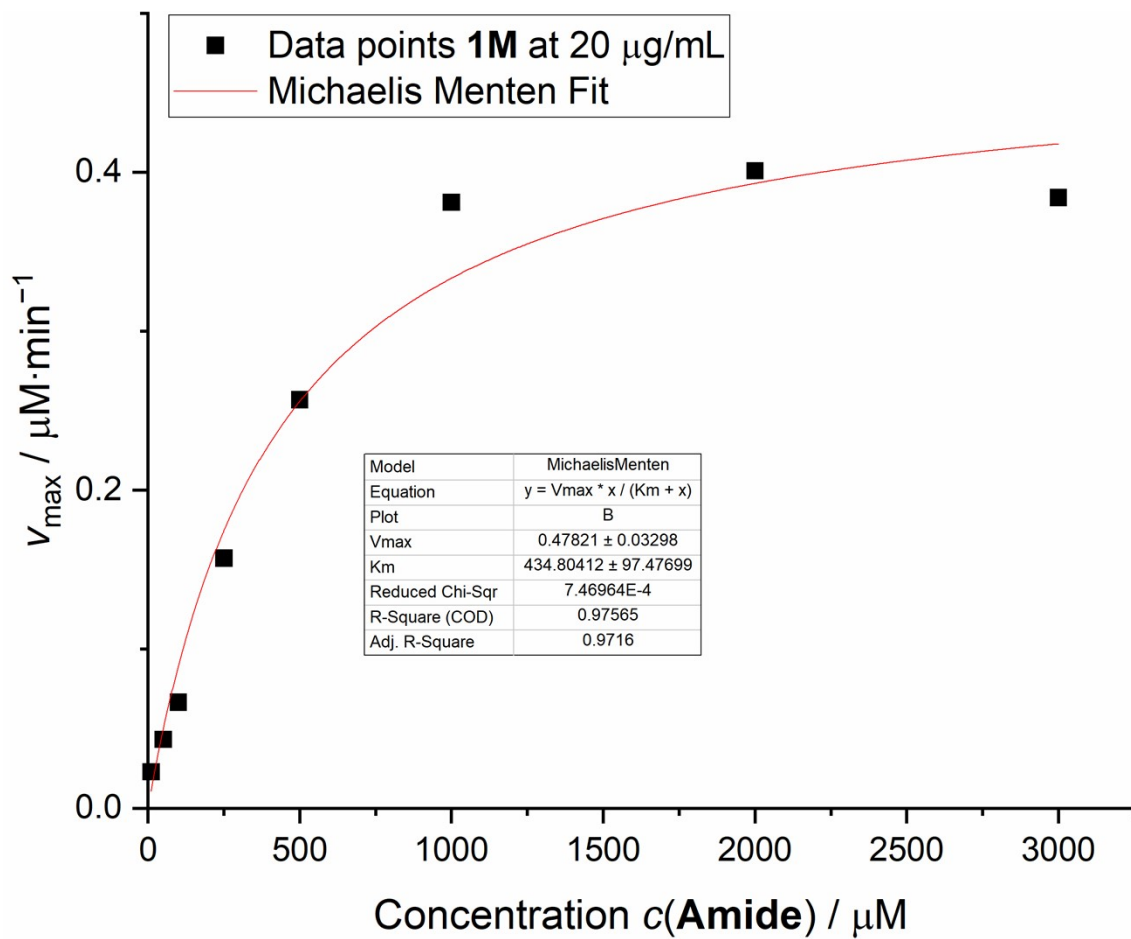

**Figure S19.** Michaelis–Menten plot for Bs2 F398D, run 2.

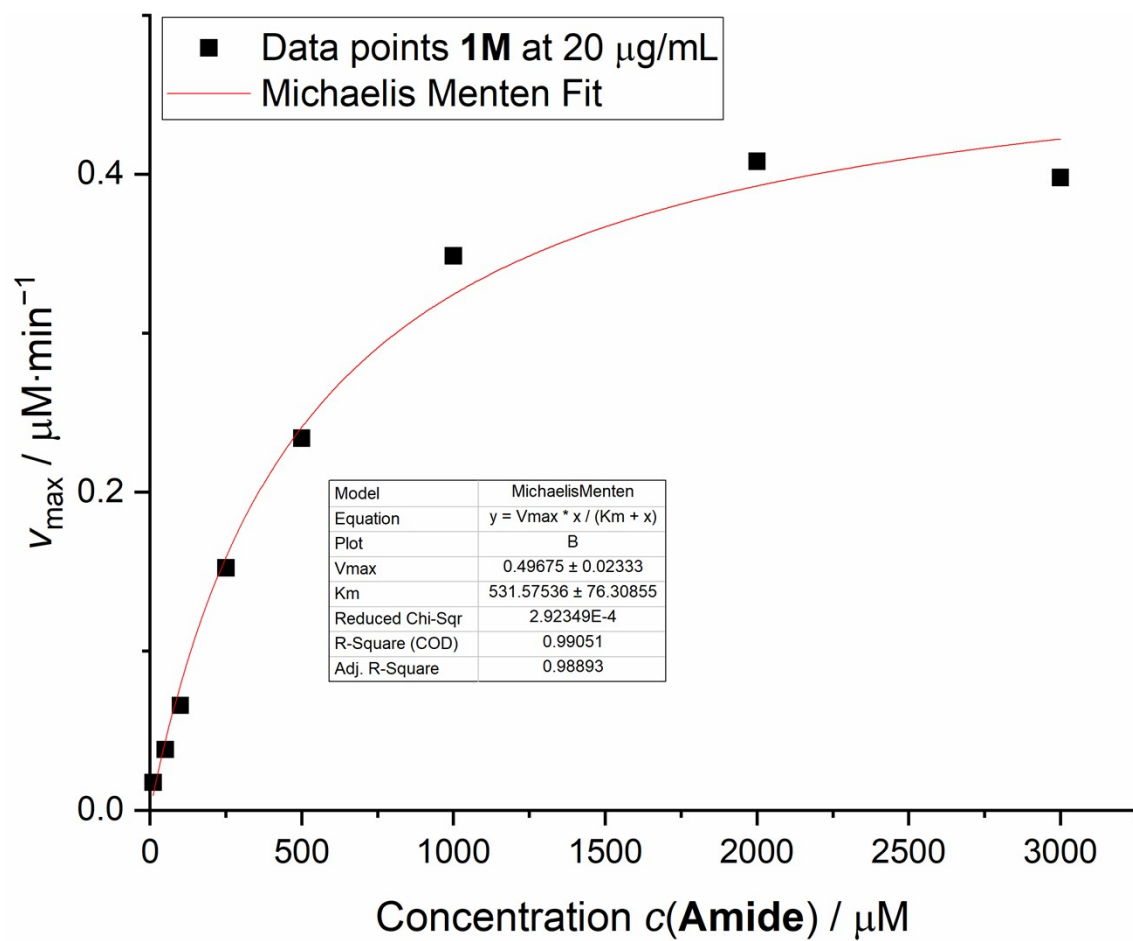

Figure S20. Michaelis–Menten plot for Bs2 F398D, run 3.



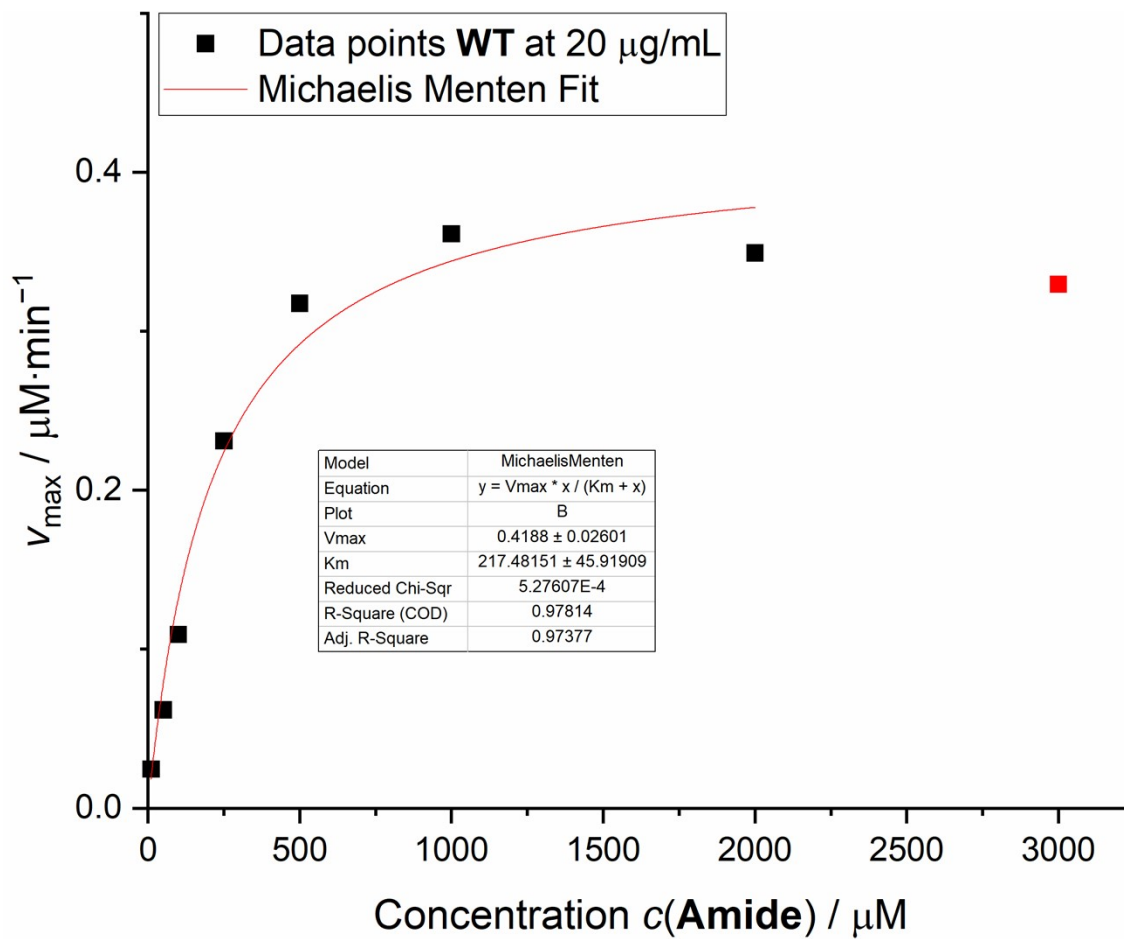

**Figure S21.** Michaelis–Menten plot for wild-type Bs2, run 1. Red data point was not included in fit.

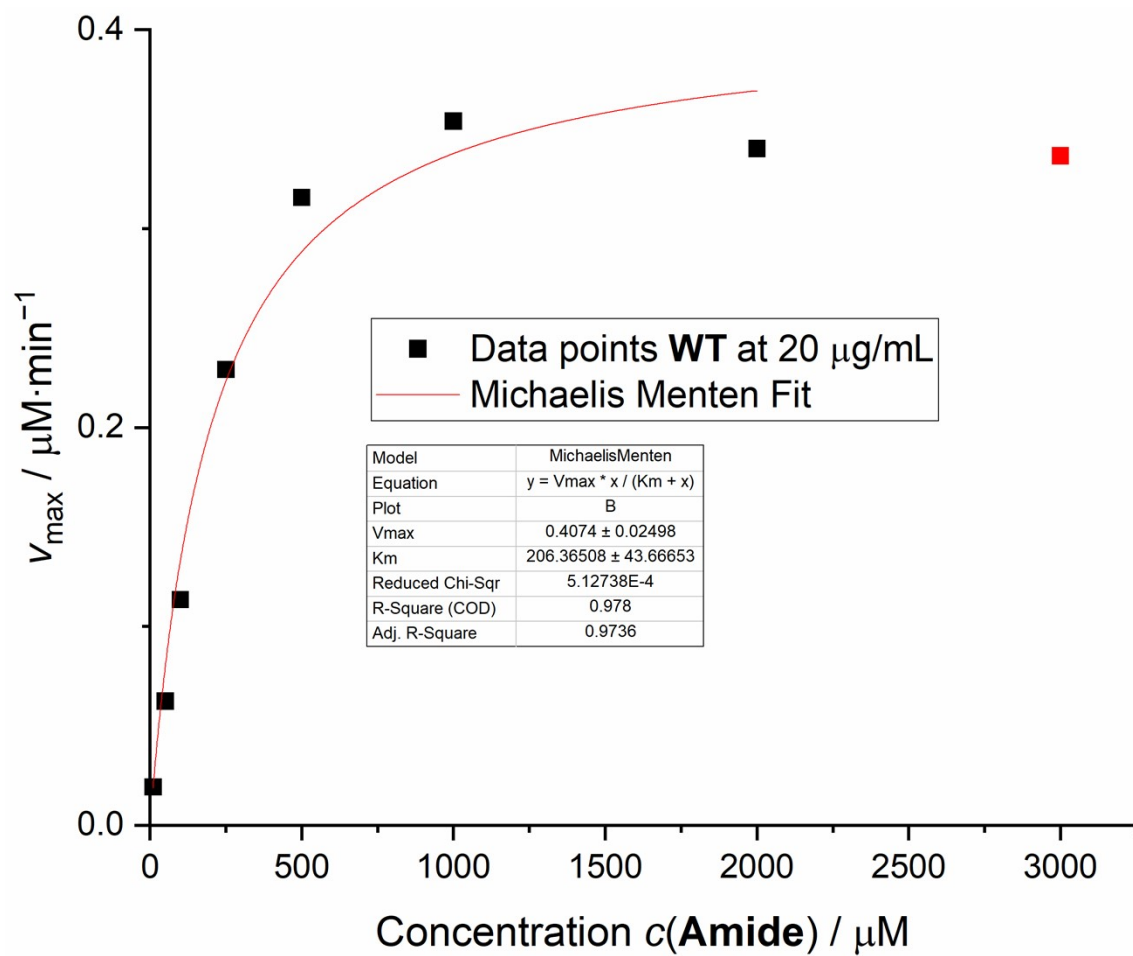

**Figure S22.** Michaelis–Menten plot for wild-type Bs2, run 2. Red data point was not included in fit.

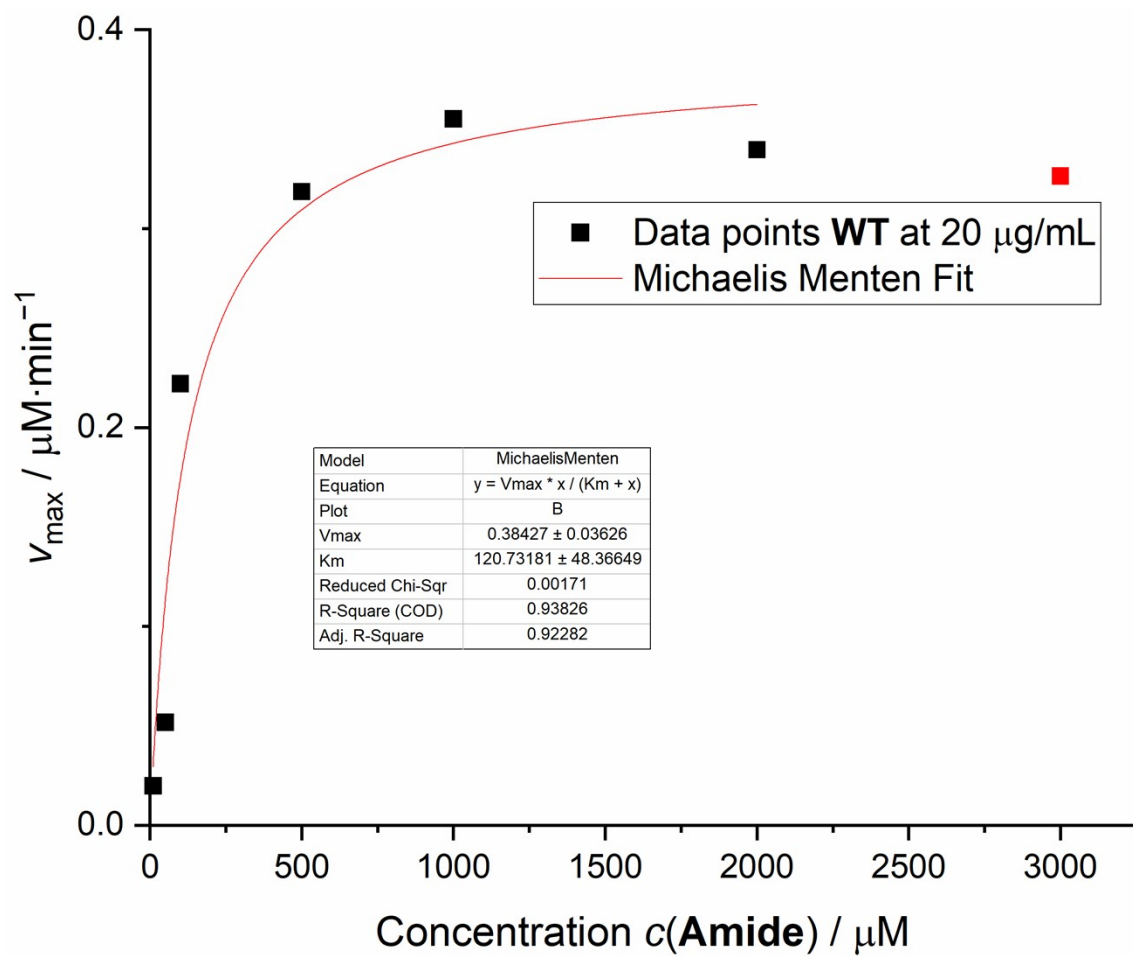

**Figure S23.** Michaelis–Menten plot for wild-type Bs2, run 3. Red data point was not included in fit.

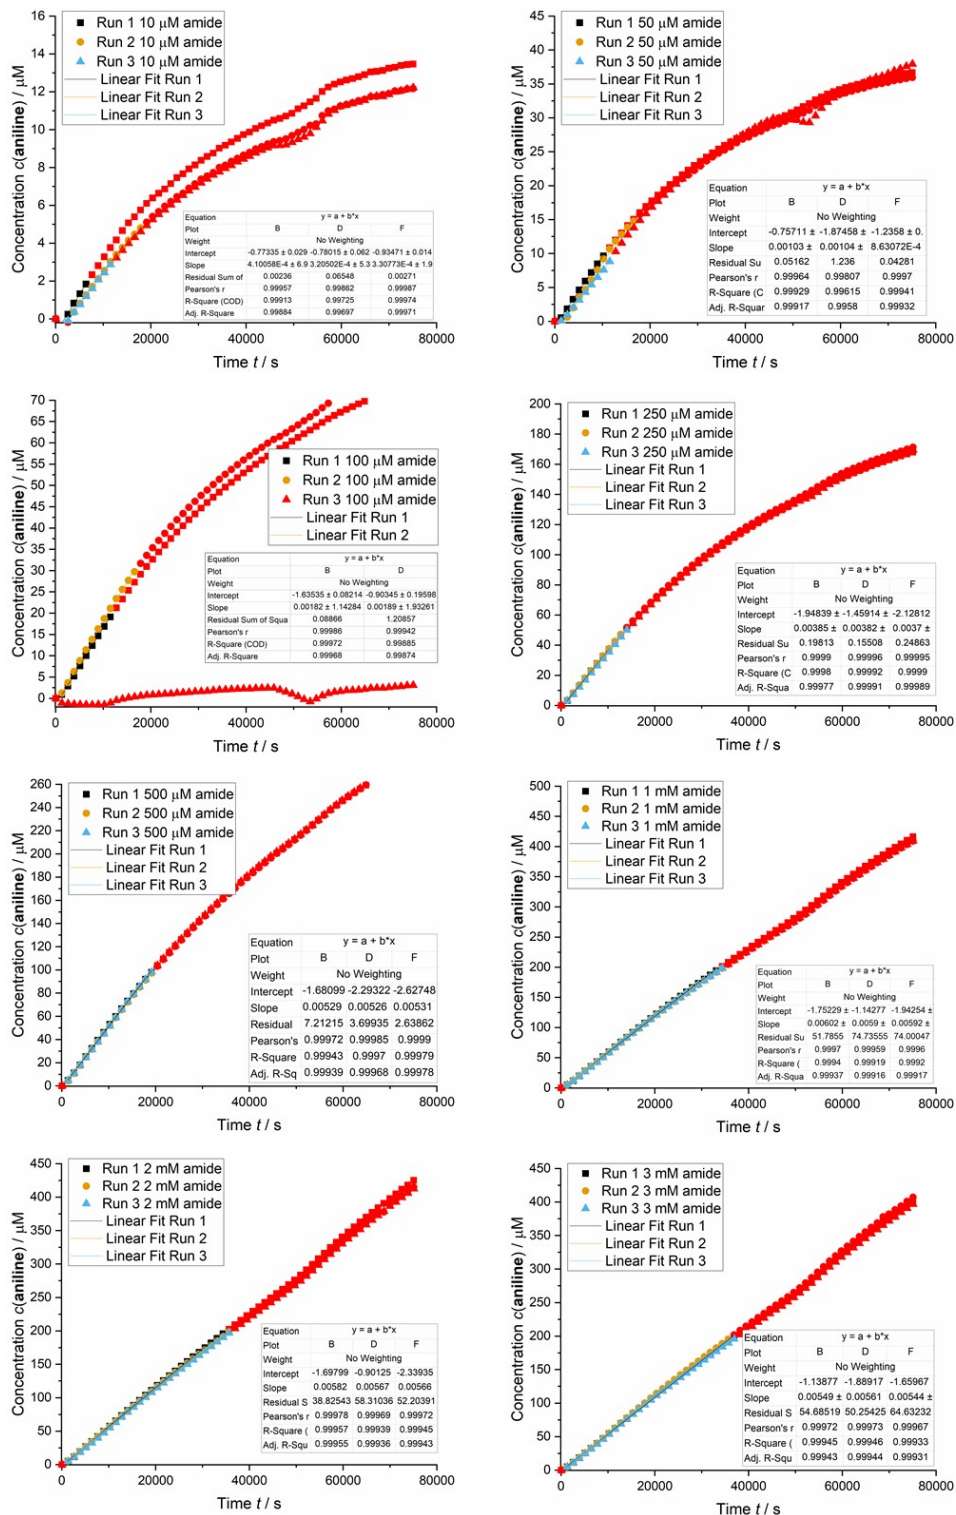

Figure S24. Kinetic profiles for wild-type Bs2. Red data points were not included for the fit for being out of the linear range.

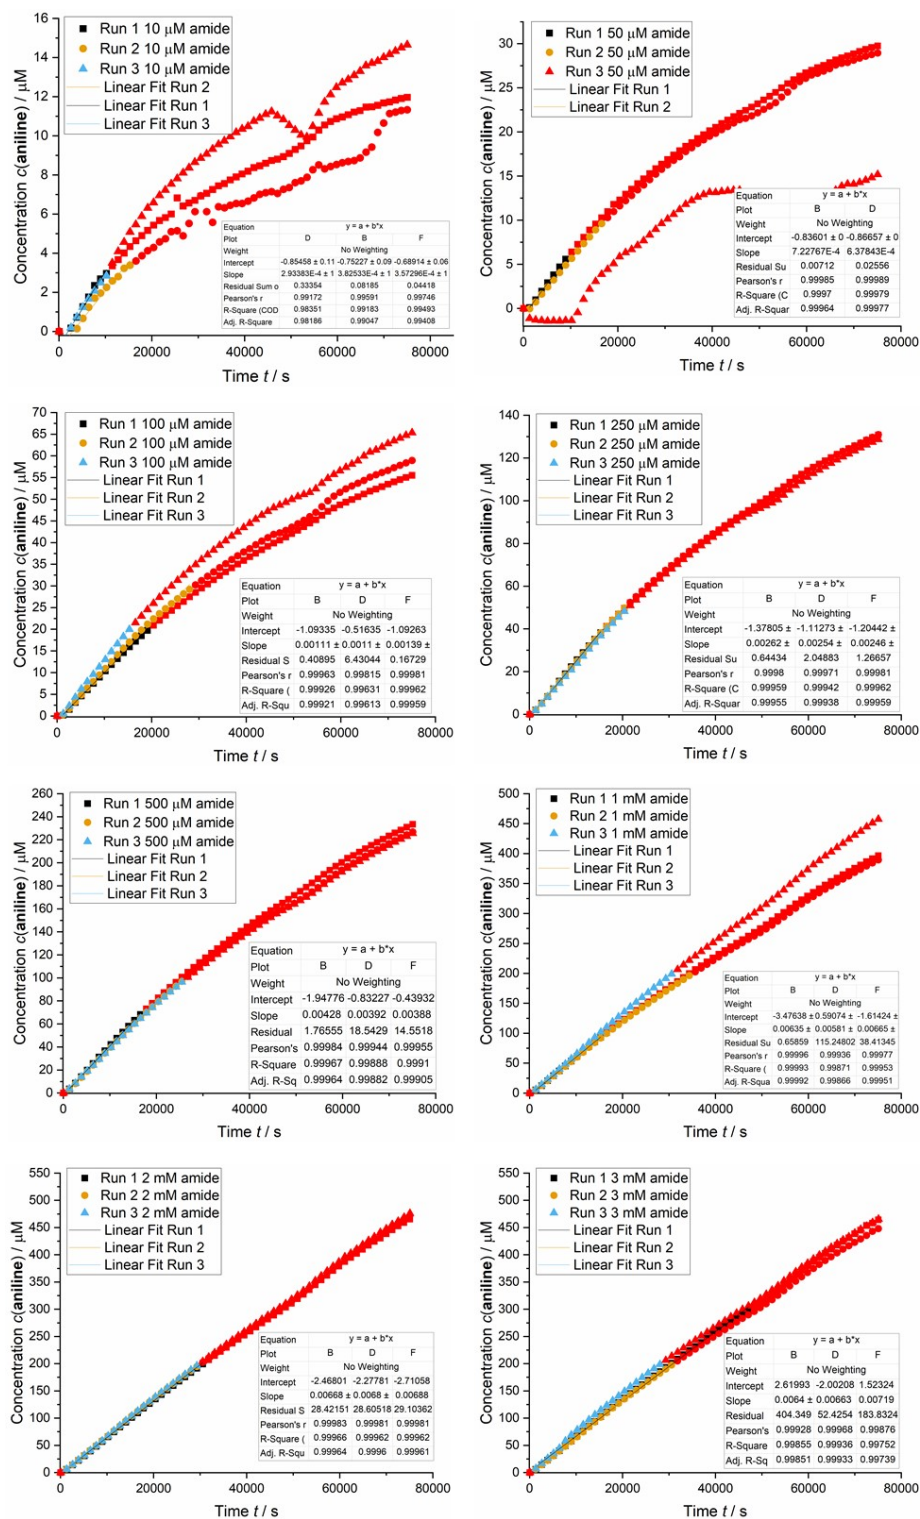

**Figure S25.** Kinetic profiles for Bs2 F398D. Red data points were not included for the fit for being out of the linear range.

**Table S11.** Exact kinetic values obtained from fitting software and derived from assay triplicates (Figures S18-S25). Values are means with population standard deviation given.

|                                           | wild-type Bs2           | Bs2 F398D               |
|-------------------------------------------|-------------------------|-------------------------|
| $v_{\max} / \mu\text{M min}^{-1}$         | $0.40349 \pm 0.014365$  | $0.502067 \pm 0.021973$ |
| $k_{\text{cat}} / \text{min}^{-1}$        | $1.112422 \pm 0.039605$ | $1.383394 \pm 0.060546$ |
| $K_M / \mu\text{M}^{-1} \text{ min}^{-1}$ | $181.5261 \pm 43.22697$ | $503.412 \pm 48.77149$  |

## REFERENCES

- (1) Hackenschmidt, S.; Moldenhauer, E. J.; Behrens, G. A.; Gand, M.; Pavlidis, I. V.; Bornscheuer, U. T. Enhancement of Promiscuous Amidase Activity of a *Bacillus Subtilis* Esterase by Formation of a  $\pi$ - $\pi$  Network. *ChemCatChem* **2014**, *6*, 1015–1020.
- (2) Consortium, T. U. UniProt: A Worldwide Hub of Protein Knowledge. *Nucleic Acids Res.* **2018**, *47*, D506–D515.
- (3) Spiller, B.; Gershenson, A.; Arnold, F. H.; Stevens, R. C. A Structural View of Evolutionary Divergence. *Proc. Natl. Acad. Sci.* **1999**, *96*, 12305–12310.
- (4) Sali, A.; Blundell, T. L. Comparative Protein Modelling by Satisfaction of Spatial Restraints. *J. Mol. Biol.* **1993**, *234*, 779–815.
- (5) Galmés, M. À.; Nödling, A. R.; Luk, L.; Świderek, K.; Moliner, V. Combined Theoretical and Experimental Study to Unravel the Differences in Promiscuous Amidase Activity of Two Nonhomologous Enzymes. *ACS Catal.* **2021**, 8635–8644.
- (6) Olsson, M. H. M.; SØndergaard, C. R.; Rostkowski, M.; Jensen, J. H. PROPKA3: Consistent Treatment of Internal and Surface Residues in Empirical pK<sub>a</sub> Predictions. *J. Chem. Theory Comput.* **2011**, *7*, 525–537.
- (7) SØndergaard, C. R.; Olsson, M. H. M.; Rostkowski, M.; Jensen, J. H. Improved Treatment of Ligands and Coupling Effects in Empirical Calculation and Rationalization of PK<sub>a</sub> Values. *J. Chem. Theory Comput.* **2011**, *7*, 2284–2295.
- (8) Jorgensen, W. L.; Chandrasekhar, J.; Madura, J. D.; Impey, R. W.; Klein, M. L. Comparison of Simple Potential Functions for Simulating Liquid Water. *J. Chem. Phys.* **1983**, *79*, 926–935.
- (9) Galmés, M. A.; García-Junceda, E.; Świderek, K.; Moliner, V. Exploring the Origin of Amidase Substrate Promiscuity in CALB by a Computational Approach. *ACS Catal.* **2020**, *10*, 1938–1946.
- (10) Duan, Y.; Wu, C.; Chowdhury, S.; Lee, M. C.; Xiong, G.; Zhang, W. E. I.; Yang, R.; Cieplak, P.; Luo, R. A. Y.; Lee, T.; Caldwell, J.; Wang, J.; Kollman, P. A Point-Charge Force Field for Molecular Mechanics Simulations of Proteins Based on Condensed-Phase. *J. Comput. Chem.* **2003**, *24*, 1999–2012.
- (11) Phillips, J. C.; Braun, R.; Wang, W. E. I.; Gumbart, J.; Tajkhorshid, E.; Villa, E.; Chipot, C.;

- Skeel, R. D.; Poincare, H. Scalable Molecular Dynamics with NAMD. *J. Comput. Chem.* **2005**, *26*, 1781–1802.
- (12) Grest, G. S.; Kremer, K. Molecular Dynamics Simulation for Polymers in the Presence of a Heat Bath. *Phys. Rev. A* **1986**, *33*, 3628–3631.
- (13) Case, D. A.; Aktulga, H. M.; Belfon, K.; Ben-Shalom, I. Y.; Brozell, S. R.; Cerutti, D. S.; Cheatham, T. E. I. I.; Cruzeiro, V. W. D.; Darden, T. A.; Duke, R. E.; Giambasu, G.; Gilson, M. K.; Gohlke, H.; Goetz, A. W.; Harris, R.; Izadi, S.; Izmailov, S. A.; Jin, C.; Kasavajhala, K.; et al. Amber 2021. University of California: San Francisco 2021.
- (14) Field, M. J.; Bash, P. A.; Karplus, M. A Combined Quantum Mechanical and Molecular Mechanical Potential for Molecular Dynamics Simulations. *J. Comput. Chem.* **1990**, *11*, 700–733.
- (15) Jorgensen, W. L.; Maxwell, D. S.; Tirado-Rives, J. Development and Testing of the OPLS All-Atom Force Field on Conformational Energetics and Properties of Organic Liquids. *J. Am. Chem. Soc.* **1996**, *118*, 11225–11236.
- (16) Field, M. J.; Albe, M.; Bret, C.; Proust-De Martin, F.; Thomas, A. The Dynamo Library for Molecular Simulations Using Hybrid Quantum Mechanical and Molecular Mechanical Potentials. *J. Comput. Chem.* **2000**, *21*, 1088–1100.
- (17) Dewar, M. J. S.; Zoebisch, E. G.; Healy, E. F.; Stewart, J. J. P. Development and Use of Quantum Mechanical Molecular Models. 76. AM1: A New General Purpose Quantum Mechanical Molecular Model. *J. Am. Chem. Soc.* **1985**, *107*, 3902–3909.
- (18) Zhao, Y.; Truhlar, D. G. The M06 Suite of Density Functionals for Main Group Thermochemistry, Thermochemical Kinetics, Noncovalent Interactions, Excited States, and Transition Elements: Two New Functionals and Systematic Testing of Four M06-Class Functionals and 12 Other Function. *Theor. Chem. Acc.* **2008**, *120*, 215–241.
- (19) Stewart, J. J. P. Quantum Chemistry Program Exchange 455. **1996**, *6*.
- (20) Frisch, M. J.; Trucks, G. W.; Schlegel, H. B.; Scuseria, G. E.; Robb, M. A.; Cheeseman, J. R.; Scalmani, G.; Barone, V.; Petersson, G. A.; Nakatsuji, H.; Li, X.; Caricato, M.; Marenich, A. V.; Bloino, J.; Janesko, B. G.; Gomperts, R.; Mennucci, B.; Hratchian, H. P.; Ortiz, J. V.; et al. Gaussian 09, Revision E.01. Gaussian, Inc.: Wallingford, CT 2009.



- (21) Byrd, R. H.; Lu, P.; Nocedal, J.; Zhu, C. A Limited Memory Algorithm for Bound Constrained Optimization. *SIAM J. Sci. Comput.* **1995**, *16*, 1190–1208.
- (22) J. Turner, A.; Moliner, V.; H. Williams, I. Transition-State Structural Refinement with GRACE and CHARMM: Flexible QM/MM Modelling for Lactate Dehydrogenase. *Phys. Chem. Chem. Phys.* **1999**, *1*, 1323–1331.
- (23) Martí, S.; Moliner, V.; Tuñón, I. Improving the QM/MM Description of Chemical Processes: A Dual Level Strategy to Explore the Potential Energy Surface in Very Large Systems. *J. Chem. Theory Comput.* **2005**, *1*, 1008–1016.
- (24) Baker, J.; Kessi, A.; Delley, B. The Generation and Use of Delocalized Internal Coordinates in Geometry Optimization. *J. Chem. Phys.* **1996**, *105*, 192–212.
- (25) Baker, J. Constrained Optimization in Delocalized Internal Coordinates. *J. Comput. Chem.* **1997**, *18*, 1079–1095.
- (26) Roux, B. The Calculation of the Potential of Mean Force Using Computer-Simulation. *Comput. Phys. Commun.* **1995**, *91*, 275–282.
- (27) Torrie, G. M.; Valleau, J. P. Non-Physical Sampling Distributions in Monte-Carlo Free-Energy Estimation - Umbrella Sampling. *J. Comput. Phys.* **1977**, *23*, 187–199.
- (28) Kumar, S.; Rosenberg, J. M.; Bouzida, D.; Swendsen, R. H.; Kollman, P. A. The Weighted Histogram Analysis Method for Free-energy Calculations on Biomolecules. I. The Method. *J. Comput. Chem.* **1992**, *13*, 1011–1021.
- (29) Verlet, L. Computer “Experiments” on Classical Fluids. I. Thermodynamical Properties of Lennard-Jones Molecules. *Phys. Rev.* **1967**, *159*, 98–103.
- (30) Ruiz-Pernía, J. J.; Silla, E.; Tuñón, I.; Martí, S.; Moliner, V. Hybrid QM/MM Potentials of Mean Force with Interpolated Corrections. *J. Phys. Chem. B* **2004**, *108*, 8427–8433.
- (31) Ruiz-Pernía, J. J.; Silla, E.; Tuñón, I.; Martí, S. Hybrid Quantum Mechanics/Molecular Mechanics Simulations with Two-Dimensional Interpolated Corrections: Application to Enzymatic Processes. *J. Phys. Chem. B* **2006**, *110*, 17663–17670.
- (32) Martí, S. QMCube (QM3): An All-Purpose Suite for Multi Scale QM/MM Calculations.
- (33) Kneller, G. R. Superposition of Molecular Structures Using Quaternions. *Mol. Simul.* **1991**, *7*,

113-119.
